# Supplementary material for: Untargeted Metabolomics Approach for the Discovery of Environment-Related Pyran-2-Ones Chemodiversity in a Marine-Sourced Penicillium restrictum
Source: MDPI journal article supplement (doi:10.3390/md19070378), 2021-06-29
Supplement: s1 [file s1]

# Untargeted metabolomics approach for the discovery of environmentally dependant pyran-2-ones chemodiversity in a marine-sourced *Penicillium restrictum*

Van-Tuyen Le<sup>1</sup>, Samuel Bertrand<sup>1</sup>, Thibaut Robiou du Pont<sup>1</sup>, Fabrice Fleury<sup>2</sup>, Nathalie Caroff<sup>3</sup>, Sandra Bourgeade-Delmas<sup>4</sup>, Cedric Logé<sup>5</sup>, Gregory Genta-Jouve<sup>6</sup>, and Olivier Grovel<sup>1\*</sup>

<sup>1</sup>EA 2160 - Mer Molécules Santé, Université de Nantes, 9 rue Bias BP 53508, 44035 Nantes-Cedex 1, France.

<sup>2</sup>Group of Mechanism and Regulation of DNA Repair and IMPACT Platform, UFIP UMR CNRS 6286, University of Nantes, 44322, Nantes, France

<sup>3</sup>EA3826, Université de Nantes, IRS2 Nantes Biotech, Nantes-Cedex1, F-44100, France

<sup>4</sup>UMR 125 PharmaDev, Université de Toulouse, IRD, Toulouse 31400, France

<sup>5</sup>EA1155-IICIMED, Université de Nantes, IRS2 Nantes Biotech, Nantes-Cedex1, F-44100, France

<sup>6</sup>C-TAC, UMR 8638 CNRS, Faculté de Pharmacie de Paris, Paris-Descartes University, Sorbonne, 4 Avenue de l'Observatoire, 75006 Paris, France.

\* Correspondence: olivier.grovel@univ-nantes.fr.

## Table of Contents

|                                                                                                                                                                                                                                                                                                             |   |
|-------------------------------------------------------------------------------------------------------------------------------------------------------------------------------------------------------------------------------------------------------------------------------------------------------------|---|
| Experimental section.....                                                                                                                                                                                                                                                                                   | 4 |
| Figure S1: Morphology of strain <i>P. restrictum</i> on 14 different media after 10 days of growth (7 media, 2 salinity).....                                                                                                                                                                               | 4 |
| Figure S2. PCA of OSMAC data in positive mode of 14 media (7 media, 2 salinity, 4 replicates) with QC (quality control). ....                                                                                                                                                                               | 4 |
| Figure S3. a) OPLS-DA scores-plot of YES-SSW versus the 6 other SSW extracts (positive ionization, n = 4; R2X cum 0.366 and R2Y cum 0.98, Q2 cum 0.703; CV-ANOVA ( <i>p</i> -value = 5.37e-4)); b) Corresponding S-plot: features highlighted in yellow correspond to discriminatory ions with VIP > 3..... | 5 |
| Table S1. Identification of representative characteristics ions of OPLS-DA separation YES-SSW media from others .....                                                                                                                                                                                       | 5 |
| Table S2: Dereplication from HRMS/MS data sets of the crude extract of <i>P. restrictum</i> MMS417 on MES-SSW medium.....                                                                                                                                                                                   | 6 |
| Figure S4. Annotation of cluster 3. Light blue nodes represent features with values VIP > 1 .....                                                                                                                                                                                                           | 7 |
| Figure S5: LC-(+)-ESIHRMS spectrum in positive mode and UV-Vis spectrum of compound 1 with corresponding structure. ....                                                                                                                                                                                    | 8 |
| Figure S6: LC-(+)-ESIHRMS spectrum in positive mode and UV-Vis spectrum of compound 2 with corresponding structure. ....                                                                                                                                                                                    | 8 |
| Figure S7: LC-(+)-ESIHRMS spectrum and UV-Vis spectrum of compound 3 with corresponding structure. ....                                                                                                                                                                                                     | 8 |
| Figure S8: LC-(+)-ESIHRMS spectrum and UV-Vis spectrum of compound 4 with corresponding structure. ....                                                                                                                                                                                                     | 9 |

|                                                                                                          |    |
|----------------------------------------------------------------------------------------------------------|----|
| Figure S9: LC-(±)-ESIHRMS spectrum and UV-Vis spectrum of compound 5 with corresponding structure. ....  | 9  |
| Figure S10: LC-(+)-ESIHRMS spectrum and UV-Vis spectrum of compound 6 with corresponding structure. .... | 9  |
| Figure S11: LC-(+)-ESIHRMS spectrum and UV-Vis spectrum of compound 7 with corresponding structure. .... | 10 |
| Figure S12: <sup>1</sup> H-NMR spectrum (500 MHz, CDCl <sub>3</sub> ) for 1 .....                        | 11 |
| Figure S13: <sup>13</sup> C-NMR spectrum (125 MHz, CDCl <sub>3</sub> ) for 1.....                        | 11 |
| Figure S14: HSQC spectrum (CDCl <sub>3</sub> ) for 1.....                                                | 12 |
| Figure S15: COSY spectrum (CDCl <sub>3</sub> ) for 1 .....                                               | 13 |
| Figure S16: HMBC spectrum (CDCl <sub>3</sub> ) for 1.....                                                | 14 |
| Figure S17: NOESY spectrum (CDCl <sub>3</sub> ) for 1 .....                                              | 15 |
| Figure S18: <sup>1</sup> H-NMR spectrum (500 MHz, CDCl <sub>3</sub> ) for 2 .....                        | 16 |
| Figure S19: <sup>13</sup> C-NMR spectrum (125 MHz, CDCl <sub>3</sub> ) of 2 .....                        | 16 |
| Figure S20: HSQC spectrum (CDCl <sub>3</sub> ) for 2.....                                                | 17 |
| Figure S21: HMBC spectrum (CDCl <sub>3</sub> ) for 2.....                                                | 18 |
| Figure S22: COSY spectrum (CDCl <sub>3</sub> ) for 2 .....                                               | 19 |
| Figure S23: NOESY spectrum (CDCl <sub>3</sub> ) for 2 .....                                              | 20 |
| Figure S24: <sup>1</sup> H-NMR spectrum (500 MHz, CDCl <sub>3</sub> ) for 3 .....                        | 21 |
| Figure S25: <sup>13</sup> C-NMR spectrum (125 MHz, CDCl <sub>3</sub> ) for 3.....                        | 22 |
| Figure S26: HSQC spectrum (CDCl <sub>3</sub> ) for 3.....                                                | 23 |
| Figure S27: HMBC spectrum (CDCl <sub>3</sub> ) for 3.....                                                | 24 |
| Figure S28: COSY spectrum (CDCl <sub>3</sub> ) for 3 .....                                               | 25 |
| Figure S29: NOESY spectrum (CDCl <sub>3</sub> ) for 3 .....                                              | 26 |
| Figure S30: <sup>1</sup> H-NMR spectrum (500 MHz, CDCl <sub>3</sub> ) for 4 .....                        | 27 |
| Figure S31: <sup>13</sup> C-NMR spectrum (125 MHz, CDCl <sub>3</sub> ) for 4.....                        | 27 |
| Figure S32: COSY spectrum (CDCl <sub>3</sub> ) for 4 .....                                               | 28 |
| Figure S33: HSQC spectrum (CDCl <sub>3</sub> ) for 4.....                                                | 29 |
| Figure S34: HMBC spectrum (CDCl <sub>3</sub> ) for 4.....                                                | 30 |
| Figure S35: NOESY spectrum (CDCl <sub>3</sub> ) for 4 .....                                              | 31 |
| Figure S36: <sup>1</sup> H-NMR spectrum (500 MHz, CDCl <sub>3</sub> ) for 5 .....                        | 32 |

|                                                                                     |    |
|-------------------------------------------------------------------------------------|----|
| Figure S37: $^{13}\text{C}$ -NMR spectrum (125 MHz, $\text{CDCl}_3$ ) for 5.....    | 33 |
| Figure S38: HSQC spectrum ( $\text{CDCl}_3$ ) for 5.....                            | 34 |
| Figure S39: HMBC spectrum ( $\text{CDCl}_3$ ) for 5.....                            | 35 |
| Figure S40: COSY spectrum ( $\text{CDCl}_3$ ) for 5 .....                           | 36 |
| Figure S41: NOESY spectrum ( $\text{CDCl}_3$ ) for 5 .....                          | 37 |
| Figure S42: $^1\text{H}$ -NMR spectrum (500 MHz, $\text{CDCl}_3$ ) for 6 .....      | 38 |
| Figure S43: $^{13}\text{C}$ -NMR spectrum (125 MHz, $\text{CDCl}_3$ ) for 6.....    | 39 |
| Figure S44: COSY spectrum ( $\text{CDCl}_3$ ) for 6 .....                           | 40 |
| Figure S45: NOESY spectrum ( $\text{CDCl}_3$ ) for 6 .....                          | 41 |
| Figure S46: HSQC spectrum ( $\text{CDCl}_3$ ) for 6.....                            | 42 |
| Figure S47: HMBC spectrum ( $\text{CDCl}_3$ ) for 6.....                            | 43 |
| Figure S48: $^1\text{H}$ -NMR spectrum (500 MHz, $\text{CDCl}_3$ ) for 7-8 .....    | 44 |
| Figure S49: $^{13}\text{C}$ -NMR spectrum (125 MHz, $\text{CDCl}_3$ ) for 7-8 ..... | 44 |
| Figure S50: HSQC spectrum ( $\text{CDCl}_3$ ) for 7-8 .....                         | 45 |
| References.....                                                                     | 46 |

## Experimental section

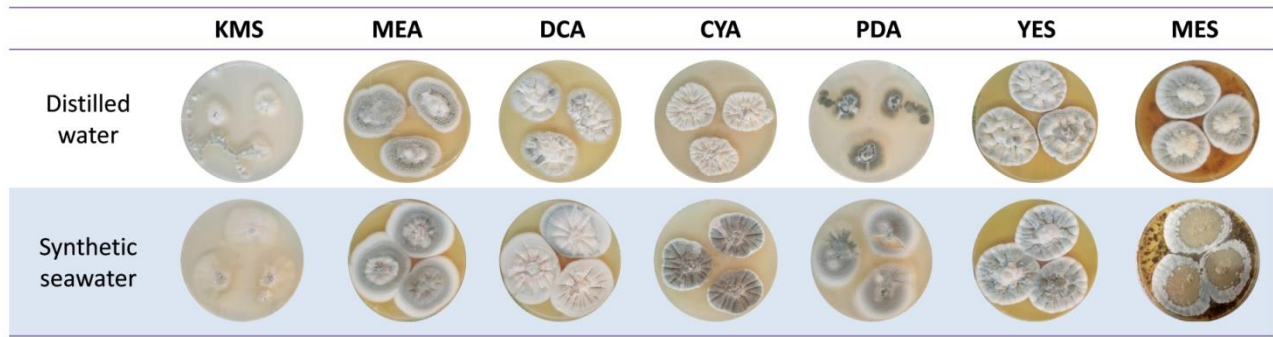

**Figure S1:** Morphology of strain *P. restrictum* on 14 different media after 10 days of growth (7 media, 2 salinity).

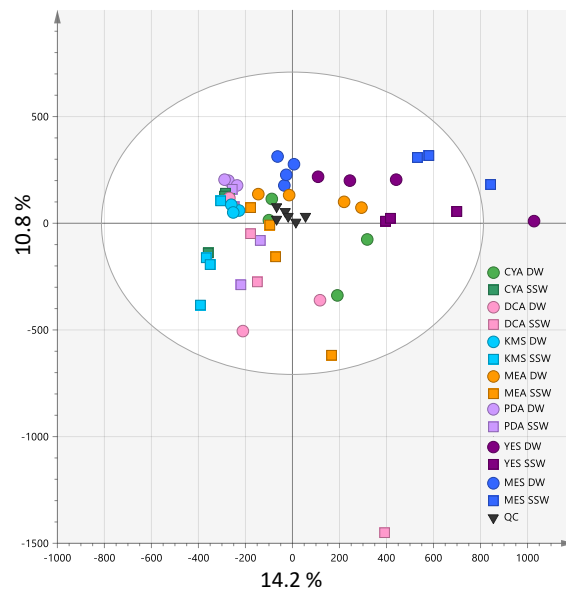

**Figure S2.** PCA of OSMAC data in positive mode of 14 media (7 media, 2 salinity, 4 replicates) with QC (quality control).

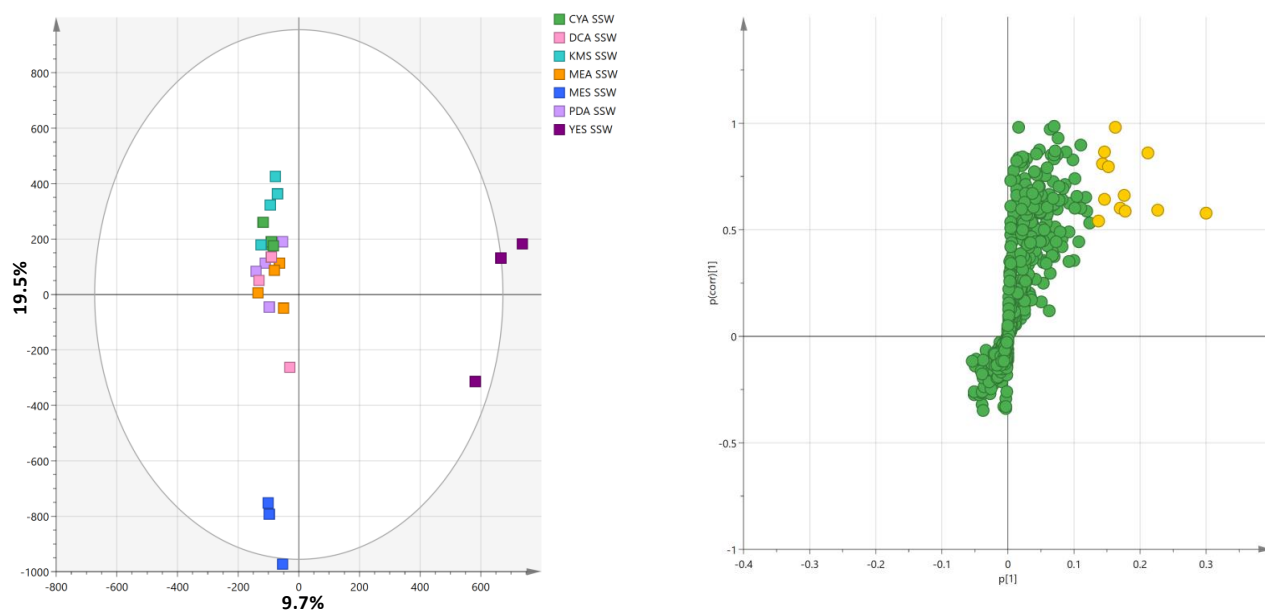

**Figure S3.** a) OPLS-DA scores-plot of YES-SSW versus the 6 other SSW extracts (positive ionization,  $n = 4$ ;  $R^2X$  cum 0.366 and  $R^2Y$  cum 0.98,  $Q^2$  cum 0.703; CV-ANOVA ( $p$ -value =  $5.37 \times 10^{-4}$ )); b) Corresponding S-plot: features highlighted in yellow correspond to discriminatory ions with  $VIP > 3$

**Table S1.** Identification of representative characteristics ions of OPLS-DA separation YES-SSW media from others

| Vip         | $m/z$    | $R_t$<br>(min) | Observed<br>features<br>(ionic<br>species) | Molecular<br>formula for<br>M | $\Delta$ ppm | UV-Vis<br>absorption<br>( $\lambda_{max}$ nm) | Putative annotation               |
|-------------|----------|----------------|--------------------------------------------|-------------------------------|--------------|-----------------------------------------------|-----------------------------------|
| <b>8.32</b> | 253.1050 | 6.52           | $[M+Na]^+$                                 | $C_{11}H_{18}O_5$             | -0.76        | 238                                           | 2'-hydroxy pestalotin and isomers |
|             | 269.0807 |                | $[M+K]^+$                                  |                               |              |                                               |                                   |
|             | 483.2219 |                | $[2M+Na]^+$                                |                               |              |                                               |                                   |
| <b>5.1</b>  | 431.2787 | 22.98          | $[M+H]^+$                                  | $C_{26}H_{38}O_5$             | -2.43        | n.d                                           | Simplicissin                      |
| <b>4.38</b> | 486.3583 | 23.87          | $[M+H]^+$                                  | $C_{30}H_{47}NO_4$            | -0.07        | n.d                                           | Melearoride A                     |
|             | 508.3407 |                | $[M+Na]^+$                                 |                               |              |                                               |                                   |
| <b>3.81</b> | 231.1239 | 4.66           | $[M+H]^+$                                  | $C_{11}H_{18}O_5$             | 1.95         | 238                                           | 2'-hydroxypestalotin and isomers  |
| <b>3.69</b> | 472.3422 | 22.27          | $[M+H]^+$                                  | $C_{29}H_{45}NO_4$            | -1.02        | n.d                                           | <i>N</i> -demethylmelearoride A   |
|             | 494.3197 |                | $[M+Na]^+$                                 |                               |              |                                               |                                   |
| <b>3.57</b> | 509.3433 | 23.91          | $[M+Na]^+$                                 | $C_{27}H_{50}O_7$             | -4.17        | n.d                                           | n.d                               |
| <b>3.48</b> | 506.3252 | 23.23          | $[M+Na]^+$                                 | $C_{30}H_{45}NO_4$            | 1.13         | n.d                                           | n.d                               |

n.d.: not hit from fungal natural product databases.

**Table S2:** Dereplication from HRMS/MS data sets of the crude extract of *P. restrictum* MMS417 on MES-SSW medium

| R <sub>t</sub> (min) | <i>m/z</i> | Adduct type                       | Molecular Formula                                             | Possible Annotations                              | Reference |
|----------------------|------------|-----------------------------------|---------------------------------------------------------------|---------------------------------------------------|-----------|
| 2.13                 | 147.0654   | [M+H] <sup>+</sup>                | C <sub>6</sub> H <sub>10</sub> O <sub>4</sub>                 | 5-Hydroxy-3-methoxy-2-pentenoic acid              | [1,2]     |
| 2.18                 | 129.0549   | [M+H] <sup>+</sup>                | C <sub>6</sub> H <sub>8</sub> O <sub>3</sub>                  | 5,6-Dihydro-4-methoxy-2 <i>H</i> -pyran-2-one     | [3]       |
| 4.65                 | 231.1225   | [M+H] <sup>+</sup>                | C <sub>11</sub> H <sub>18</sub> O <sub>5</sub>                | 2'-Hydroxy pestalotine isomers                    | [4,5]     |
| 5.66                 | 229.1047   | [M+H] <sup>+</sup>                | C <sub>11</sub> H <sub>16</sub> O <sub>5</sub>                | LL-P880γ isomers                                  | [6]       |
| 5.88                 | 185.0845   | [M+H] <sup>+</sup>                | C <sub>9</sub> H <sub>12</sub> O <sub>4</sub>                 | 8-Macommelinol                                    | [7]       |
| 6.09                 | 229.1048   | [M+H] <sup>+</sup>                | C <sub>11</sub> H <sub>16</sub> O <sub>5</sub>                | LL-P880γ isomers                                  | [6]       |
| 6.52                 | 231.1237   | [M+H] <sup>+</sup>                | C <sub>11</sub> H <sub>18</sub> O <sub>5</sub>                | 2'-Hydroxy pestalotine isomers                    | [4,5]     |
| 6.58                 | 211.0581   | [M+H] <sup>+</sup>                | C <sub>10</sub> H <sub>10</sub> O <sub>5</sub>                | Pyran-2-one derivative                            |           |
| 7.29                 | 229.1049   | [M+H] <sup>+</sup>                | C <sub>11</sub> H <sub>16</sub> O <sub>5</sub>                | LL-P880γ isomers                                  | [6]       |
| 9.08                 | 215.1281   | [M+H] <sup>+</sup>                | C <sub>11</sub> H <sub>18</sub> O <sub>4</sub>                | (-)-Pestalotin                                    | [4,5]     |
| 9.71                 | 235.0963   | [M+K] <sup>+</sup>                | C <sub>11</sub> H <sub>18</sub> O <sub>3</sub>                | 6-Pentyl-4-methoxy-2 <i>H</i> -pyran-2-one        | [8]       |
| 9.09                 | 213.1132   | [M+H] <sup>+</sup>                | C <sub>11</sub> H <sub>16</sub> O <sub>4</sub>                | Dehydropestalotin isomers                         | [9,10]    |
| 9.82                 | 213.1139   | [M+H] <sup>+</sup>                | C <sub>11</sub> H <sub>16</sub> O <sub>4</sub>                | Dehydropestalotin isomers                         | [9,10]    |
| 10.03                | 213.1132   | [M+H] <sup>+</sup>                | C <sub>11</sub> H <sub>16</sub> O <sub>4</sub>                | Pyran-2-one derivative                            |           |
| 13.75                | 197.1154   | [M+H] <sup>+</sup>                | C <sub>11</sub> H <sub>18</sub> O <sub>3</sub>                | 6-Pentyl-4-methoxy-2 <i>H</i> -pyran-2-one        | [8]       |
| 15.08                | 371.2819   | [M+H] <sup>+</sup>                | C <sub>21</sub> H <sub>38</sub> O <sub>5</sub>                | n.d.                                              |           |
| 19.41                | 484.2959   | [M+Na] <sup>+</sup>               | C <sub>27</sub> H <sub>43</sub> NO <sub>5</sub>               | PF 1163B                                          | [11]      |
| 19.62                | 467.3157   | [M+Na] <sup>+</sup>               | C <sub>28</sub> H <sub>44</sub> O <sub>4</sub>                | Antibiotic Mer-NF 8054A                           | [12]      |
| 20.72                | 451.3219   | [M+NH <sub>4</sub> ] <sup>+</sup> | C <sub>25</sub> H <sub>39</sub> NO <sub>5</sub>               | Aspochalasin K                                    | [13]      |
| 21.96                | 349.2359   | [M+H] <sup>+</sup>                | C <sub>21</sub> H <sub>32</sub> O <sub>4</sub>                | Brassicicene C                                    | [14]      |
| 21.97                | 393.3115   | [M+H] <sup>+</sup>                | C <sub>28</sub> H <sub>40</sub> O                             | Ergostatetraen-3-one isomers                      | [15,16]   |
| 22.27                | 472.3422   | [M+H] <sup>+</sup>                | C <sub>29</sub> H <sub>45</sub> NO <sub>4</sub>               | <i>N</i> -demethylmelearoride A                   | [17]      |
| 22.35                | 441.3029   | [M+H] <sup>+</sup>                | C <sub>22</sub> H <sub>40</sub> N <sub>4</sub> O <sub>5</sub> | n.d.                                              |           |
| 22.64                | 384.3513   | [M+H] <sup>+</sup>                | C <sub>23</sub> H <sub>45</sub> NO <sub>3</sub>               | n.d.                                              |           |
| 22.98                | 431.2796   | [M+Na] <sup>+</sup>               | C <sub>24</sub> H <sub>40</sub> O <sub>5</sub>                | Simplicissin                                      | [18]      |
| 23.22                | 393.3105   | [M+H] <sup>+</sup>                | C <sub>28</sub> H <sub>40</sub> O                             | Ergostatetraen-3-one isomers                      | [15,16]   |
| 23.41                | 411.3253   | [M+H] <sup>+</sup>                | C <sub>28</sub> H <sub>42</sub> O <sub>2</sub>                | 3β-Hydroxyergosta-8,14,24(28)-trien-7-one isomers | [19]      |
| 23.53                | 393.3104   | [M+H] <sup>+</sup>                | C <sub>28</sub> H <sub>40</sub> O                             | Ergostatetraen-3-one isomers                      | [15,16]   |
| 23.77                | 375.3014   | [M+H] <sup>+</sup>                | C <sub>28</sub> H <sub>38</sub>                               | Ergostahexaene isomers                            | [20]      |
| 23.81                | 486.3580   | [M+H] <sup>+</sup>                | C <sub>30</sub> H <sub>47</sub> NO <sub>4</sub>               | Melearoride A                                     | [21]      |
| 23.87                | 443.3115   | [M+H] <sup>+</sup>                | C <sub>28</sub> H <sub>42</sub> O <sub>4</sub>                | Paxisterol                                        | [22]      |
| 23.87                | 393.3112   | [M+H] <sup>+</sup>                | C <sub>28</sub> H <sub>40</sub> O                             | Ergostatetraen-3-one isomers                      | [15,16]   |
| 23.88                | 522.3563   | [M+Na] <sup>+</sup>               | C <sub>29</sub> H <sub>47</sub> NO <sub>5</sub>               | <i>N</i> -demethyl PF 1163E isomers               |           |
| 24.07                | 500.3816   | [M+H] <sup>+</sup>                | C <sub>29</sub> H <sub>47</sub> NO <sub>5</sub>               | <i>N</i> -demethyl PF 1163E isomers               |           |
| 24.07                | 411.3284   | [M+H] <sup>+</sup>                | C <sub>28</sub> H <sub>42</sub> O <sub>2</sub>                | 3β-Hydroxyergosta-8,14,24(28)-trien-7-one isomers | [19]      |
| 24.08                | 433.2983   | [M+H] <sup>+</sup>                | C <sub>26</sub> H <sub>40</sub> O <sub>5</sub>                | Curvicollide B                                    | [23]      |
| 24.2                 | 395.3267   | [M+H] <sup>+</sup>                | C <sub>28</sub> H <sub>42</sub> O                             | Ergostatetraen-3-ol                               | [24]      |
| 24.58                | 391.2879   | [M+H] <sup>+</sup>                | C <sub>24</sub> H <sub>38</sub> O <sub>4</sub>                | n.d.                                              |           |
| 24.78                | 375.3015   | [M+H] <sup>+</sup>                | C <sub>28</sub> H <sub>38</sub>                               | Ergostahexaene isomers                            | [20]      |
| 25.22                | 514.3834   | [M+H] <sup>+</sup>                | C <sub>32</sub> H <sub>51</sub> NO <sub>4</sub>               | PF 1163E                                          | [25]      |

n.d.: not hit from fungal natural product databases.

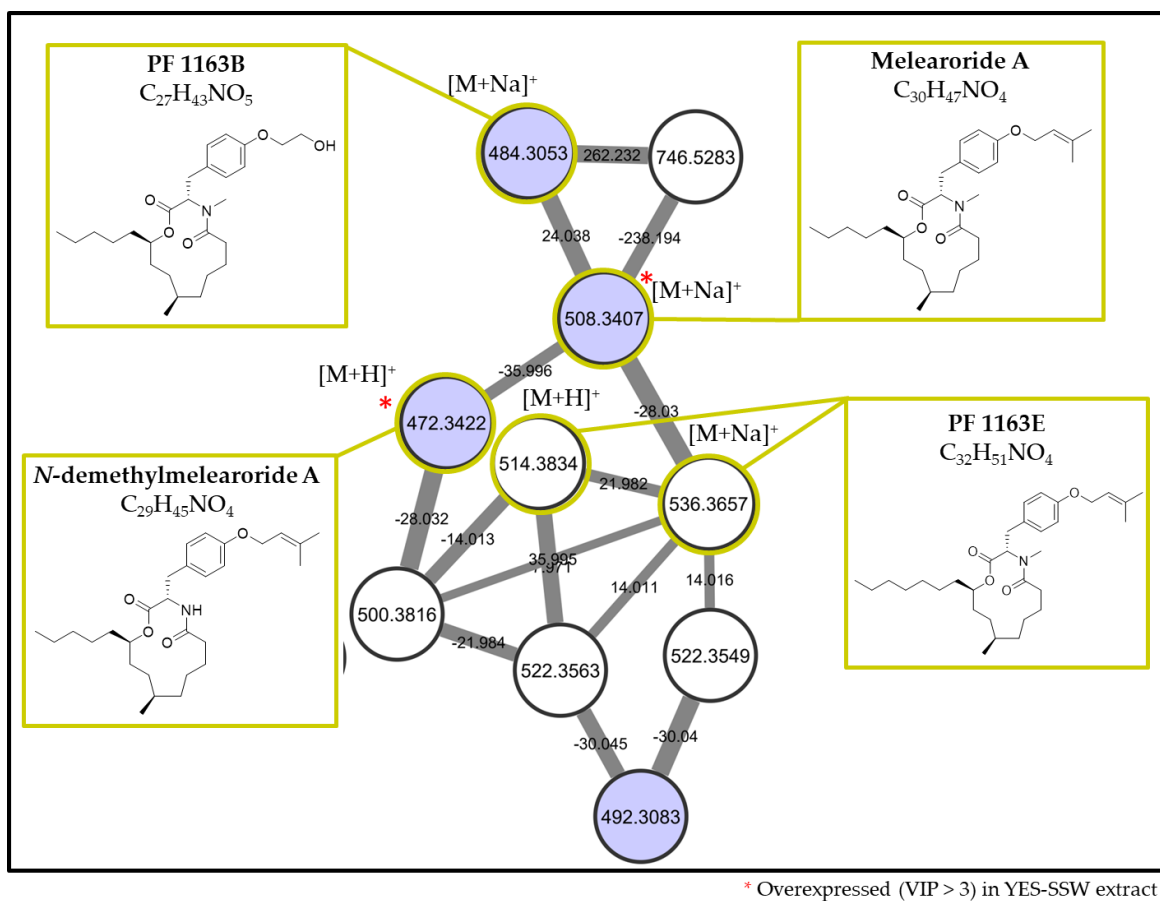

**Figure S4.** Annotation of cluster 3. Light blue nodes represent features with values VIP > 1

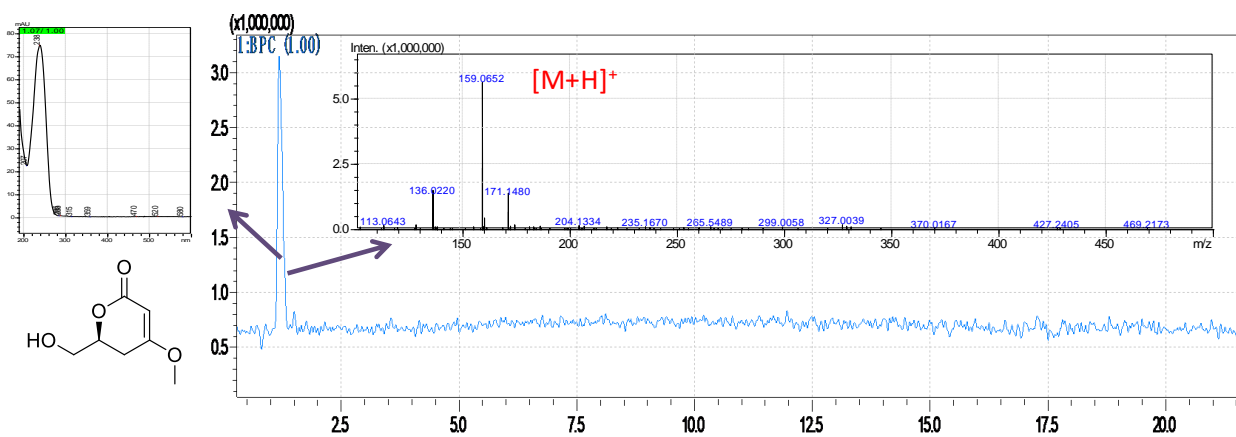

**Figure S5:** LC-(+)-ESI/HRMS spectrum and UV-Vis spectrum of compound **1** with corresponding structure.

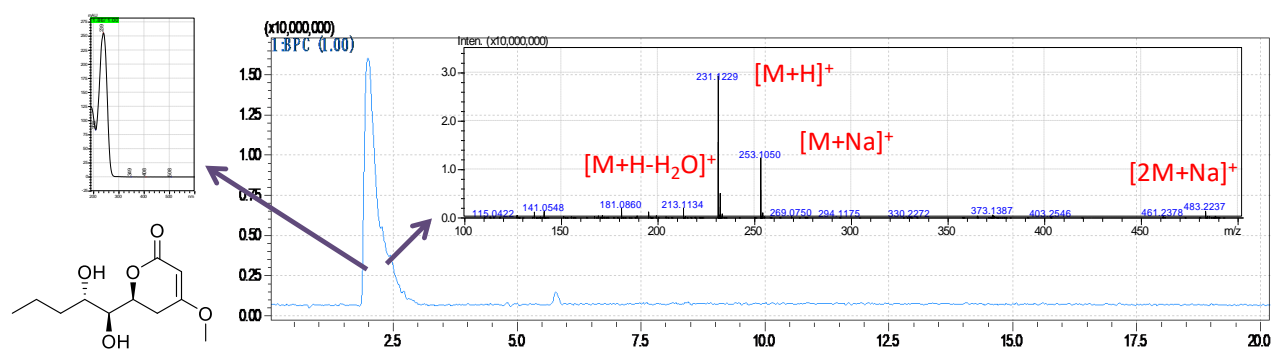

**Figure S6:** LC-(+)-ESI/HRMS spectrum and UV-Vis spectrum of compound **2** with corresponding structure.

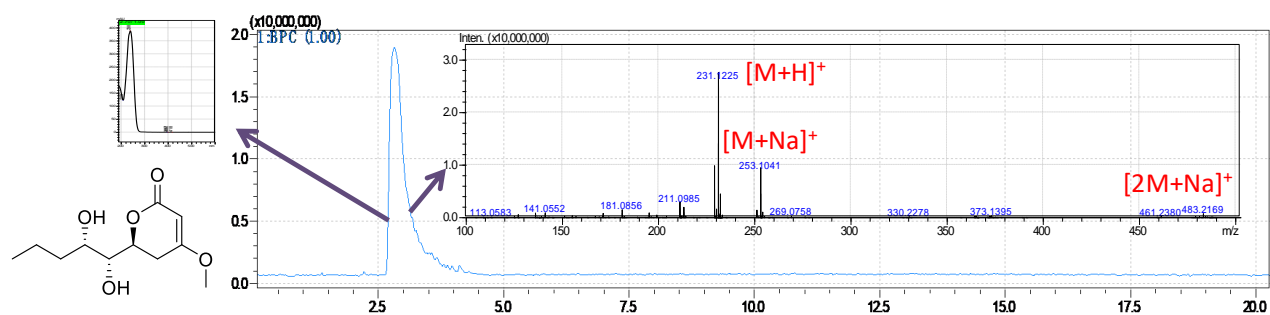

**Figure S7:** LC-(+)-ESI/HRMS spectrum and UV-Vis spectrum of compound **3** with corresponding structure.

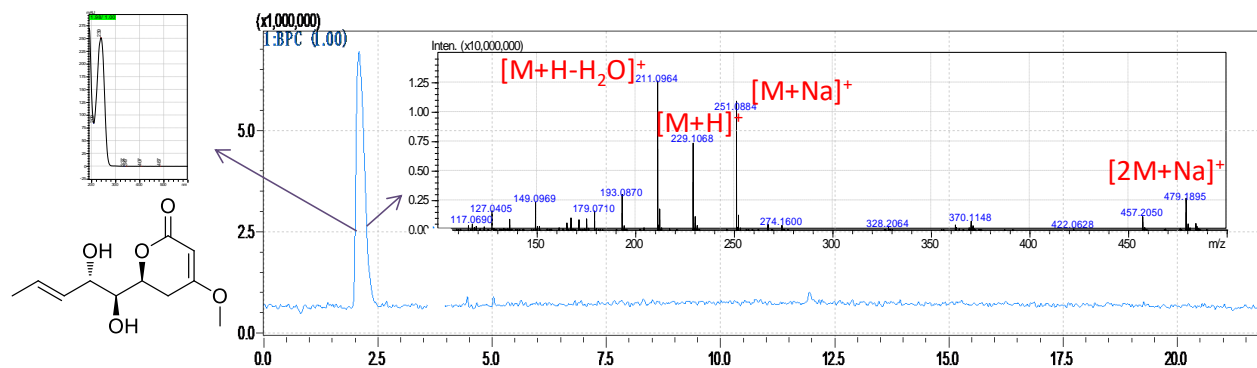

Figure S8: LC-(+)-ESIHRMS spectrum and UV-Vis spectrum of compound 4 with corresponding structure.

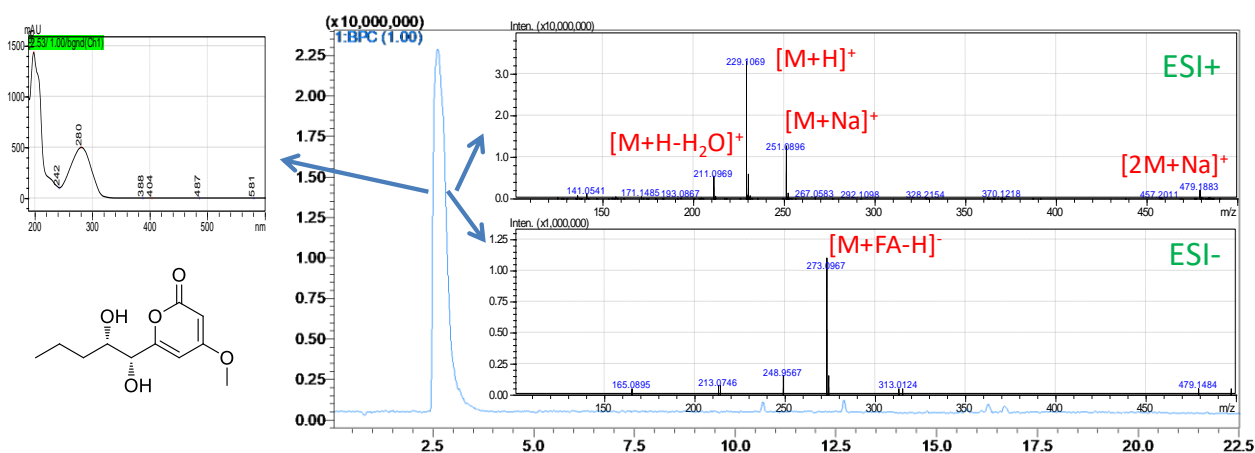

Figure S9: LC-(±)-ESIHRMS spectrum and UV-Vis spectrum of compound 5 with corresponding structure.

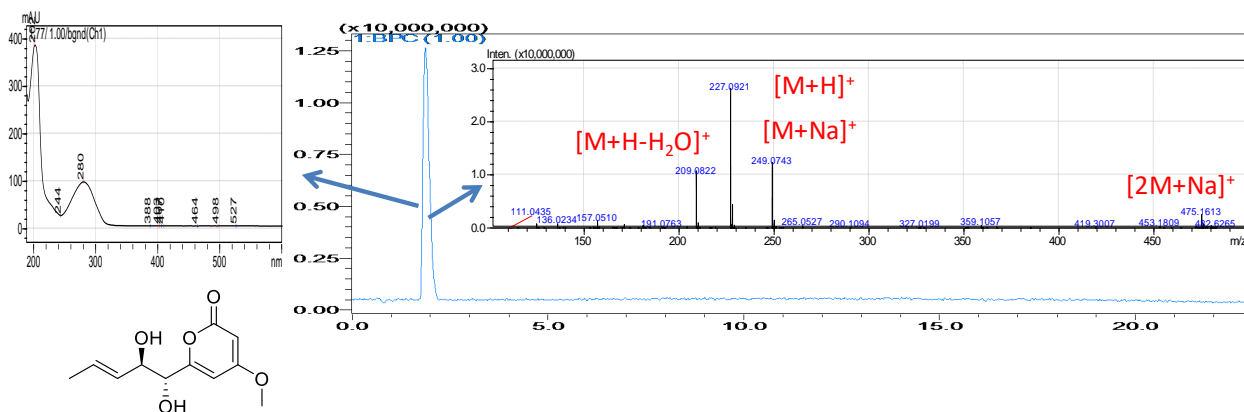

Figure S10: LC-(+)-ESIHRMS spectrum and UV-Vis spectrum of compound 6 with corresponding structure.

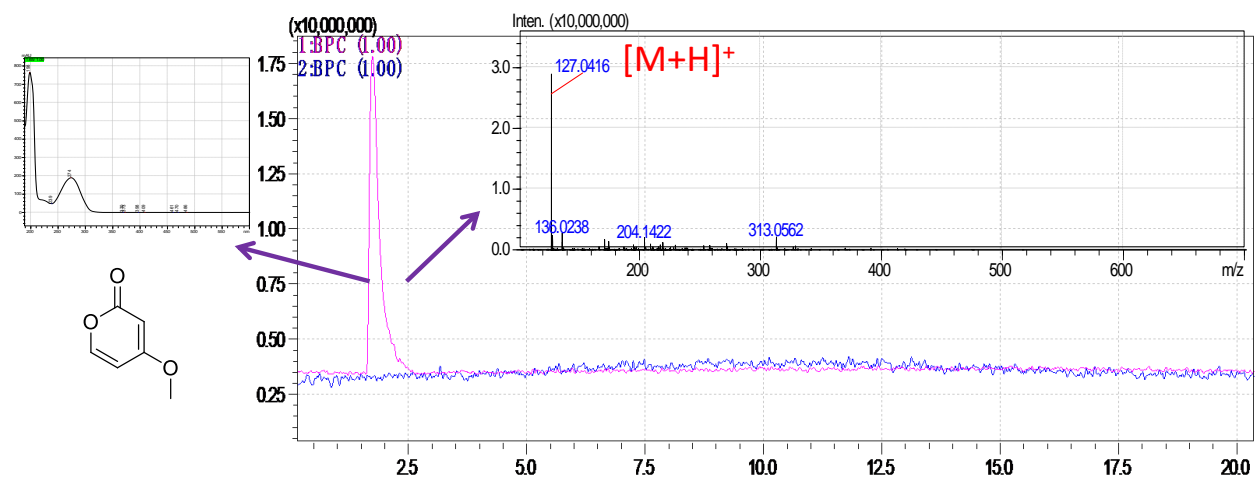

**Figure S11:** LC-(+)-ESIHRMS spectrum and UV-Vis spectrum of compound 7 with corresponding structure.

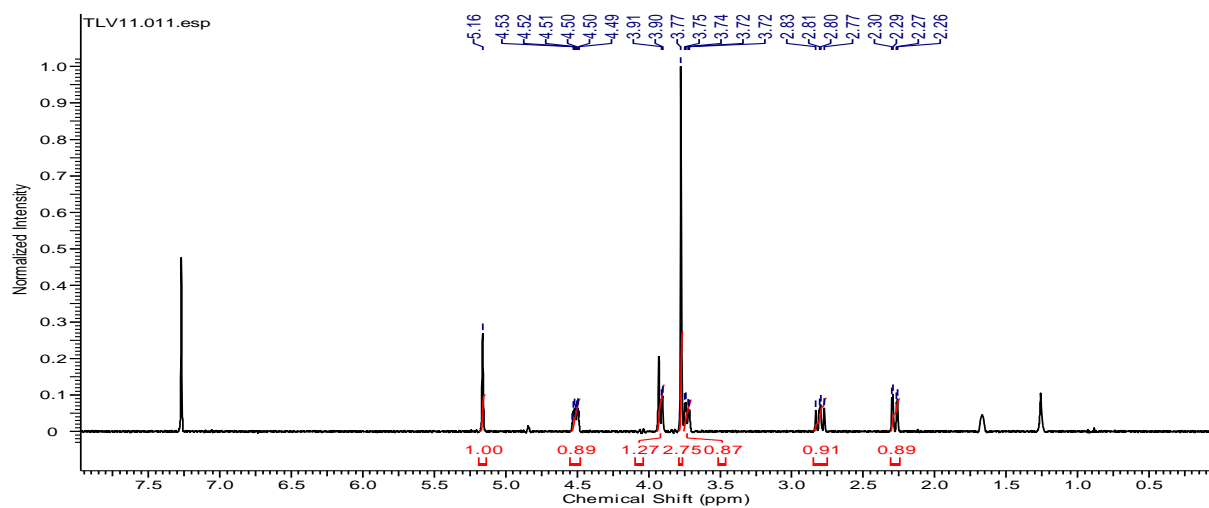

Figure S12:  $^1\text{H}$ -NMR spectrum (500 MHz,  $\text{CDCl}_3$ ) for 1

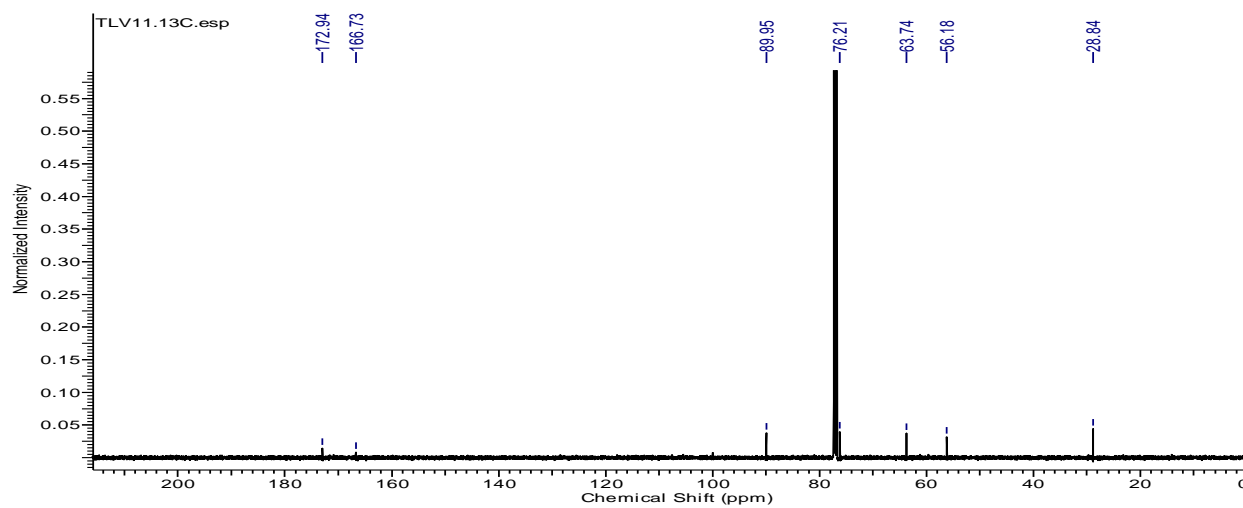

Figure S13:  $^{13}\text{C}$ -NMR spectrum (125 MHz,  $\text{CDCl}_3$ ) for 1

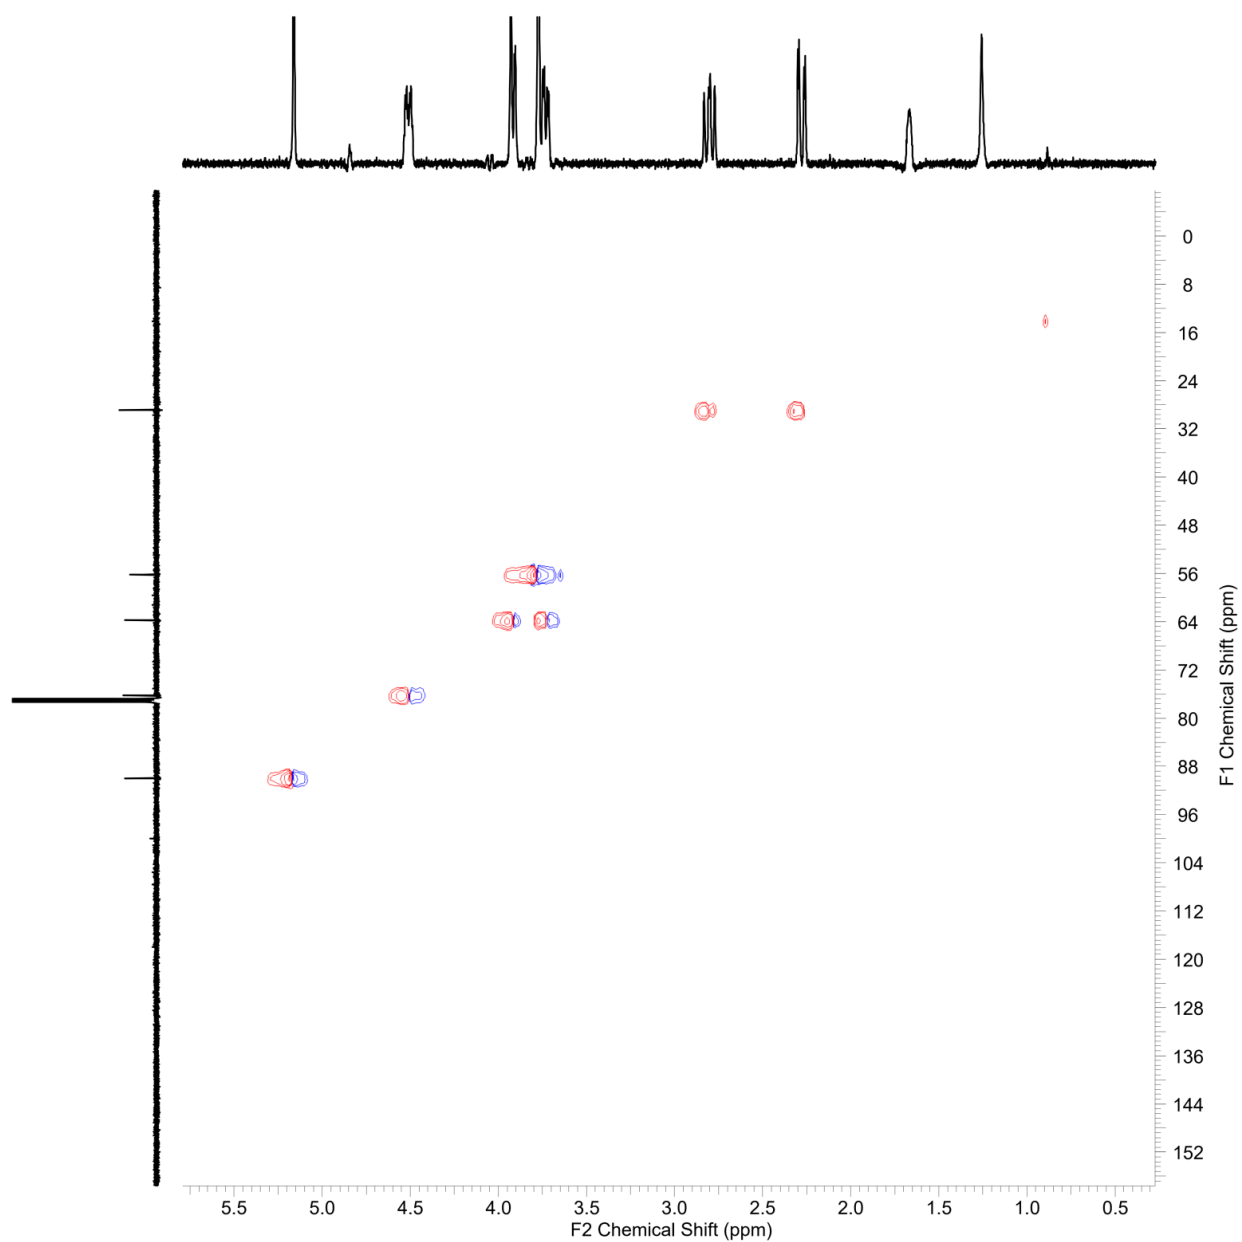

Figure S14: HSQC spectrum (CDCl<sub>3</sub>) for 1

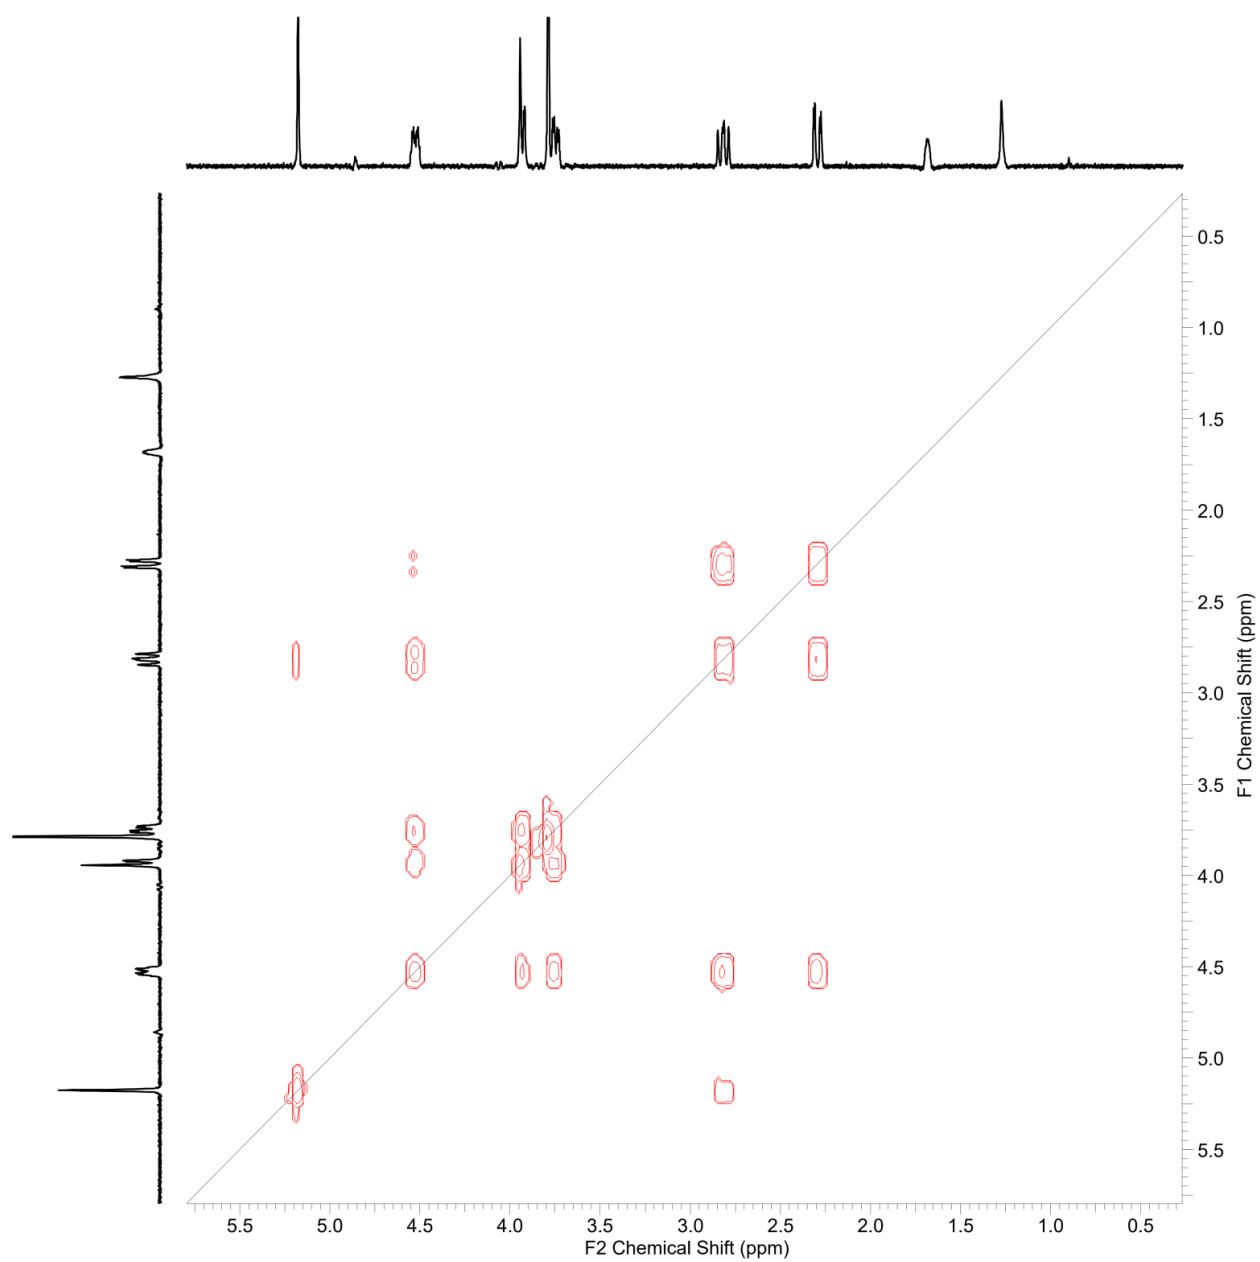

**Figure S15:** COSY spectrum (CDCl<sub>3</sub>) for **1**

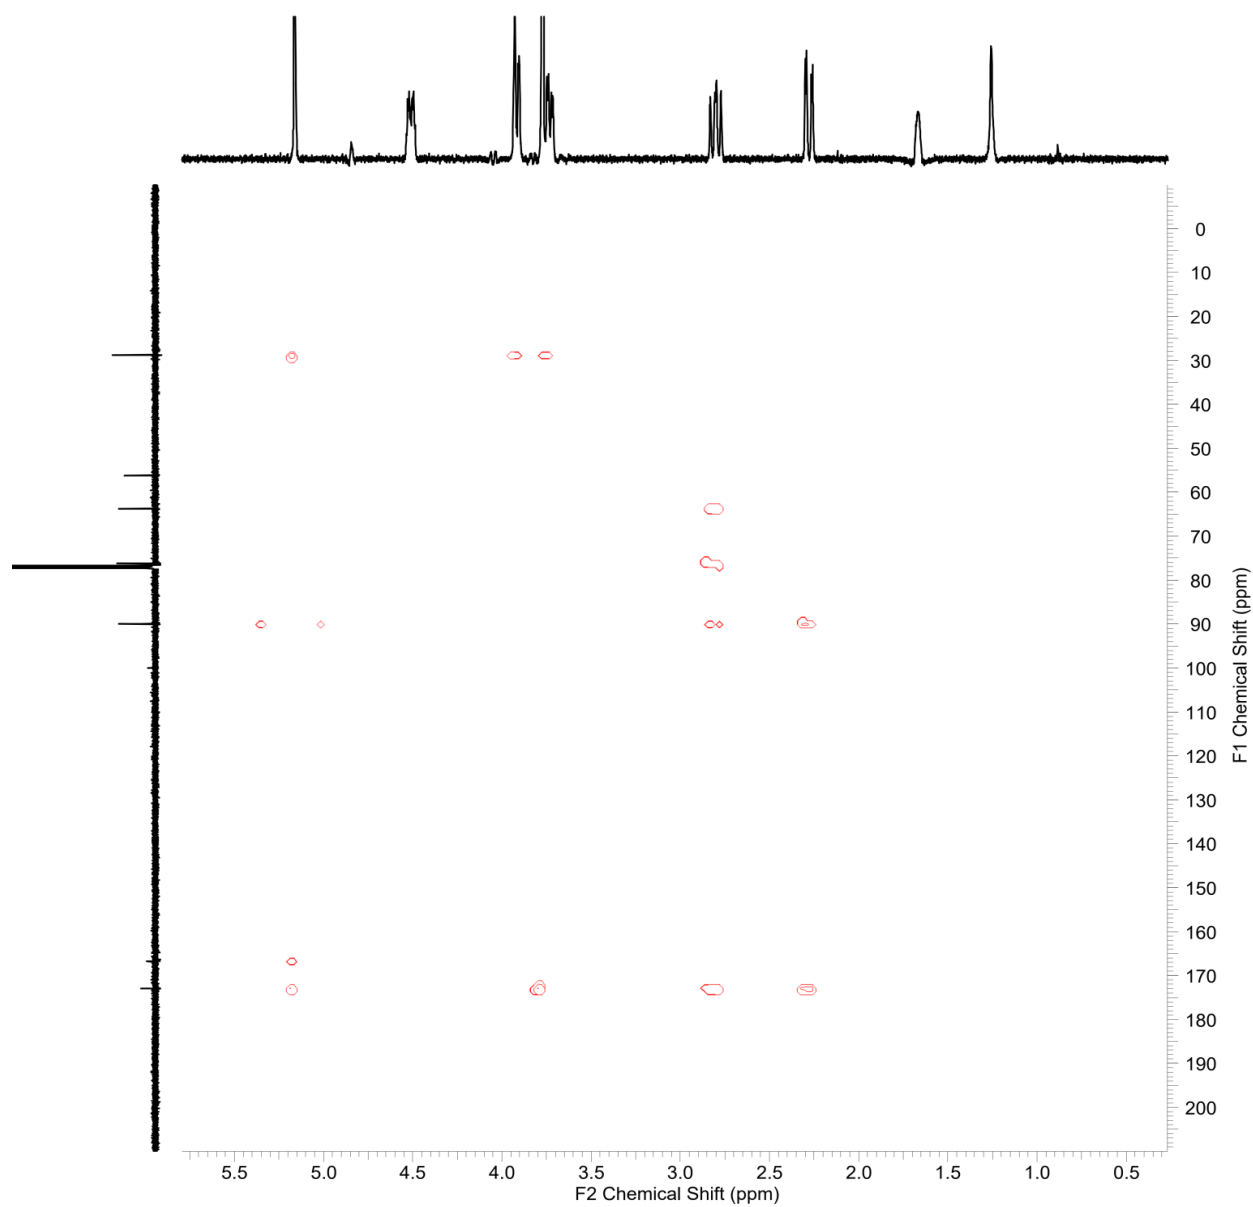

Figure S16: HMBC spectrum (CDCl<sub>3</sub>) for **1**

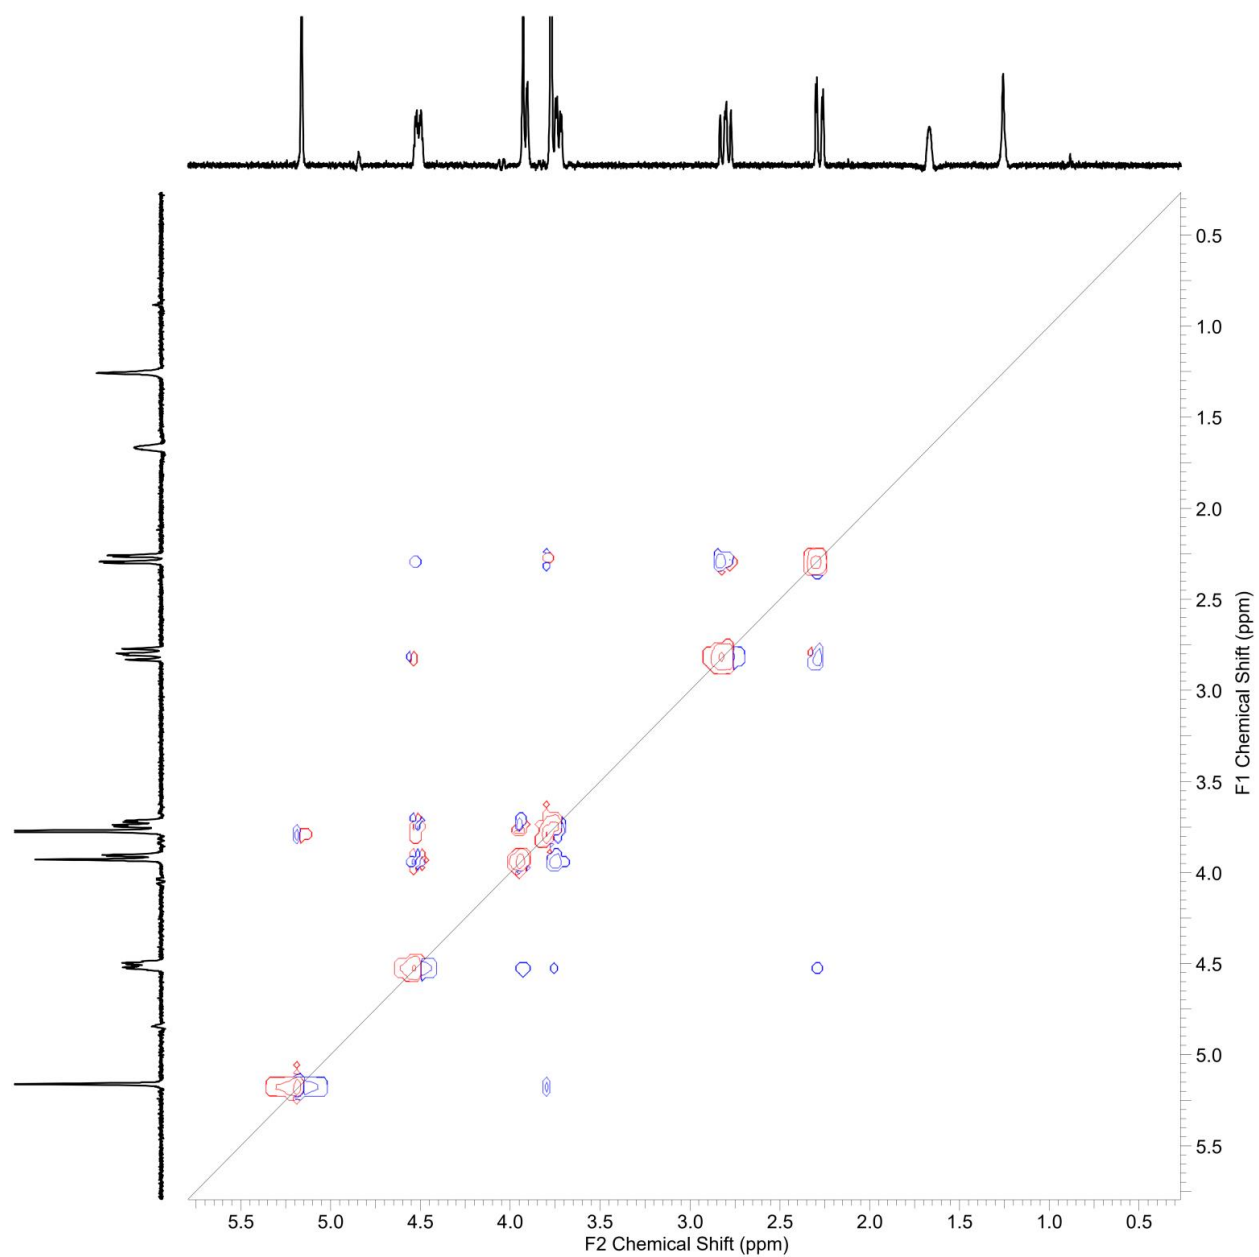

**Figure S17:** NOESY spectrum ( $\text{CDCl}_3$ ) for **1**

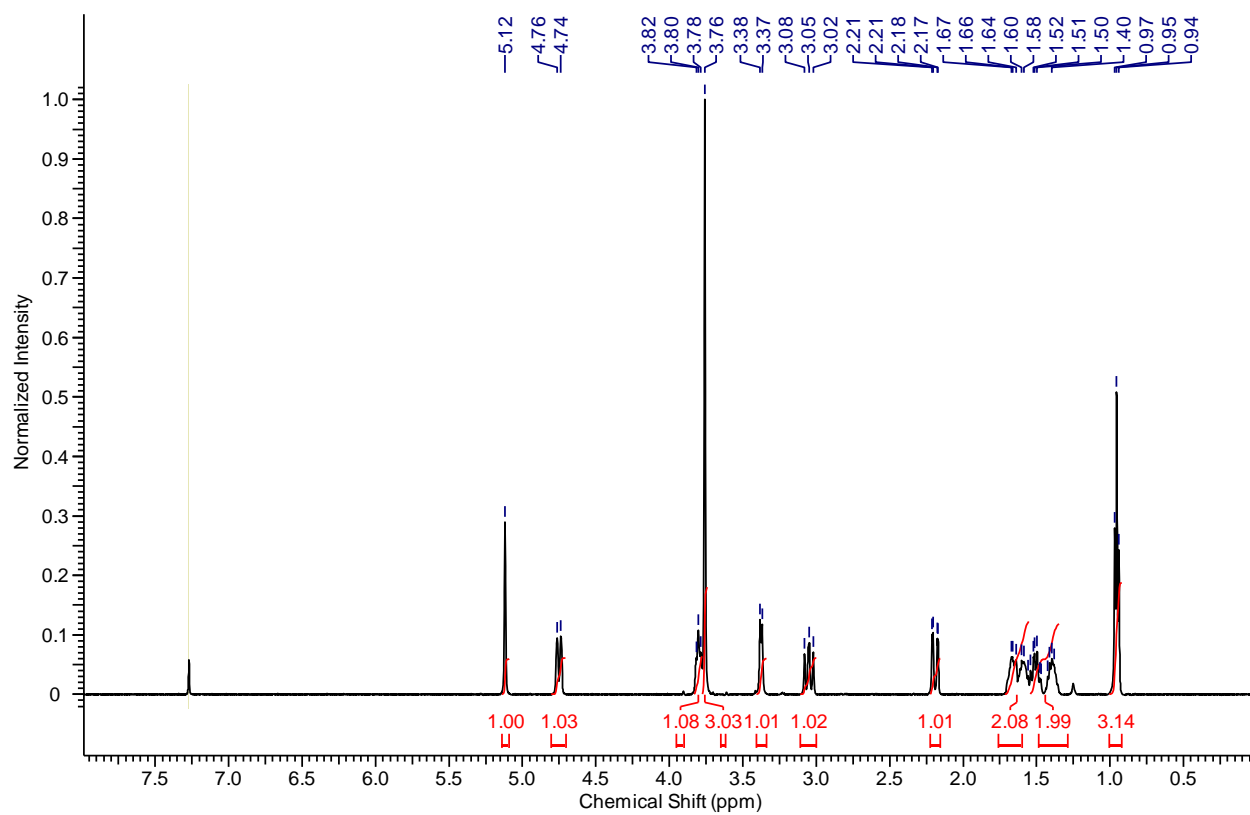

**Figure S18:**  $^1\text{H}$ -NMR spectrum (500 MHz,  $\text{CDCl}_3$ ) for 2

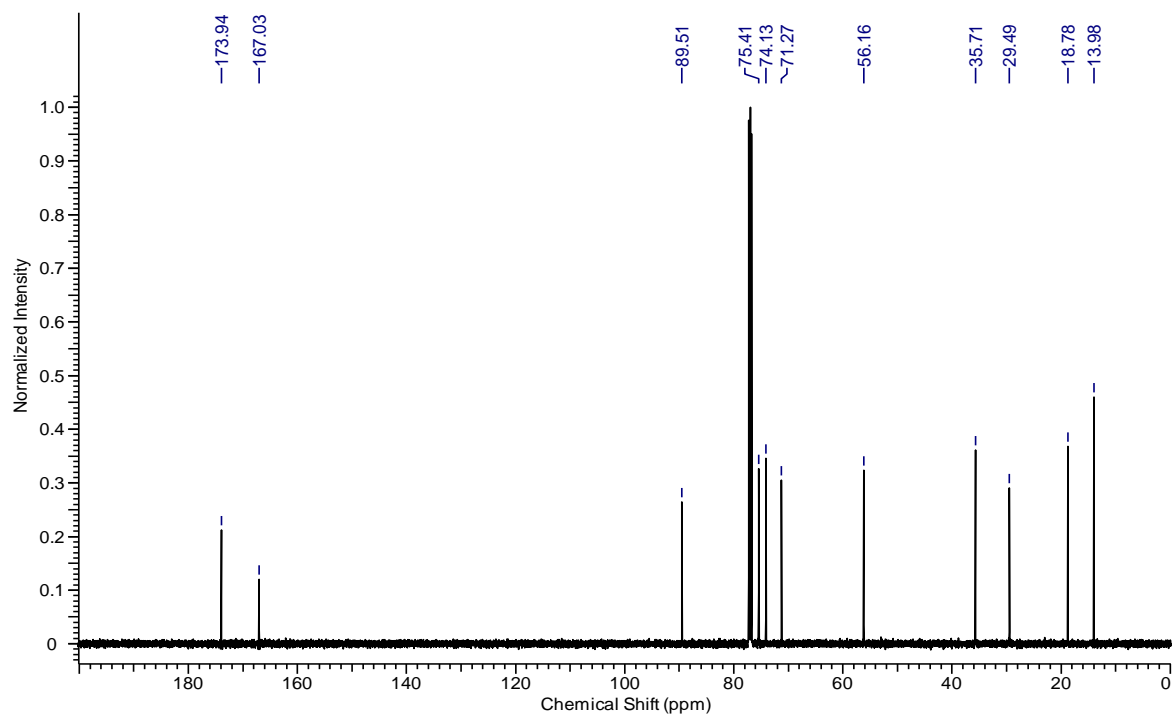

**Figure S19:**  $^{13}\text{C}$ -NMR spectrum (125 MHz,  $\text{CDCl}_3$ ) of 2

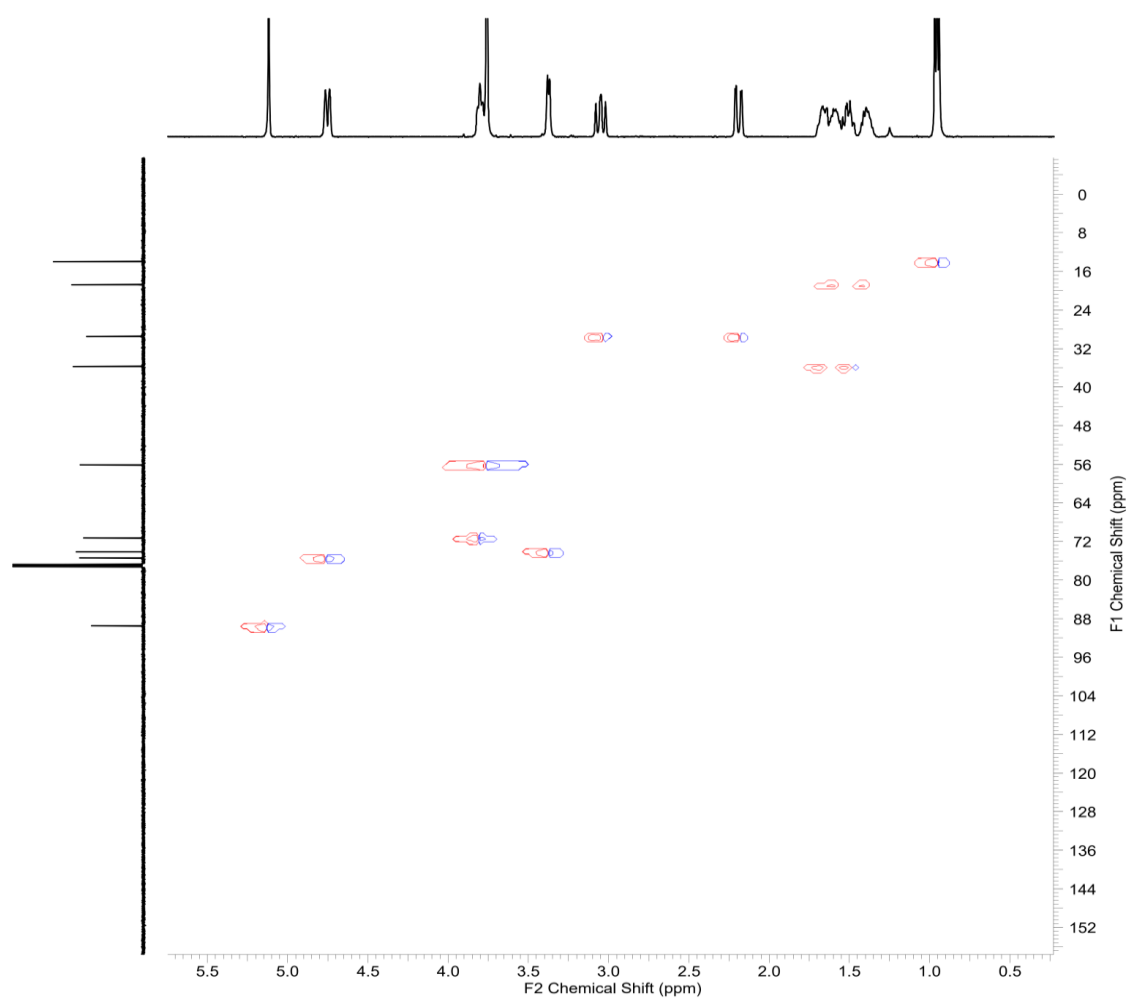

**Figure S20:** HSQC spectrum (CDCl<sub>3</sub>) for **2**

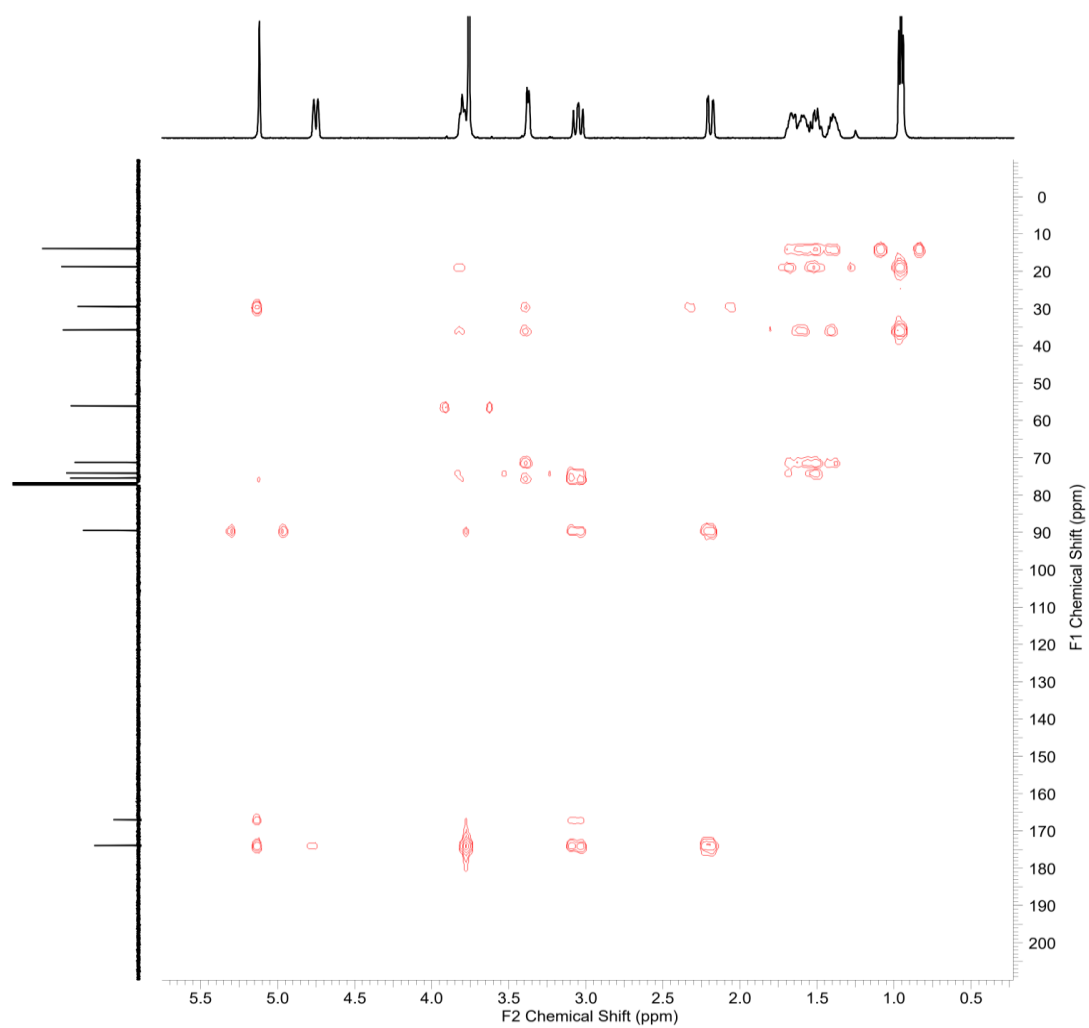

**Figure S21:** HMBC spectrum (CDCl<sub>3</sub>) for **2**

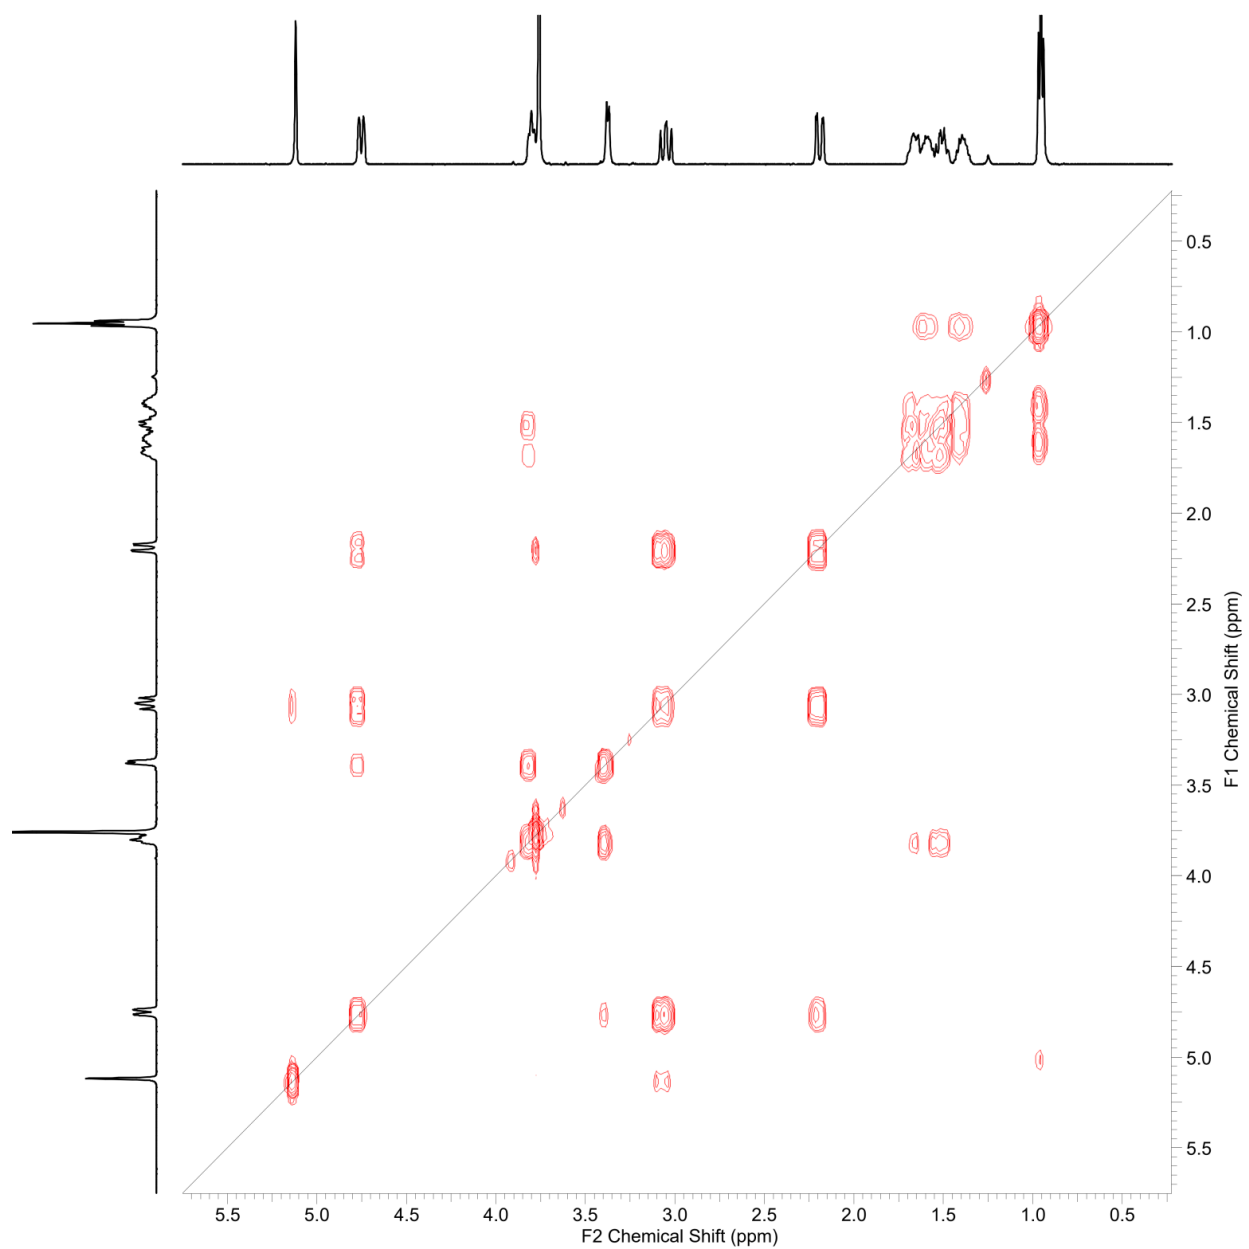

**Figure S22:** COSY spectrum (CDCl<sub>3</sub>) for **2**

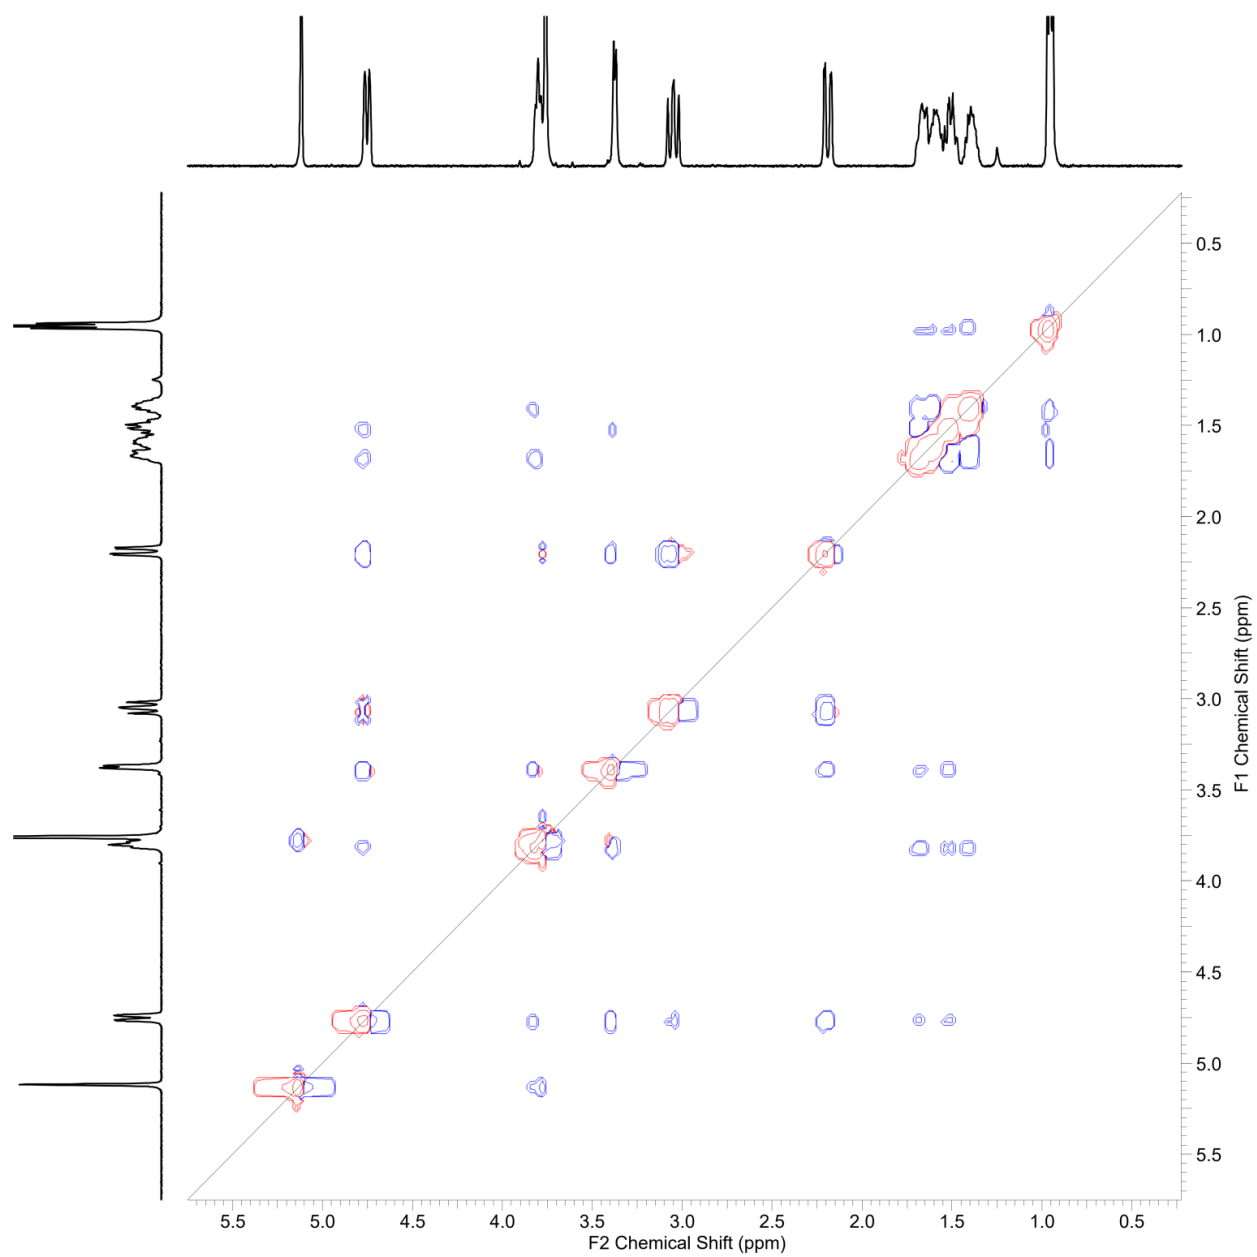

**Figure S23:** NOESY spectrum (CDCl<sub>3</sub>) for **2**

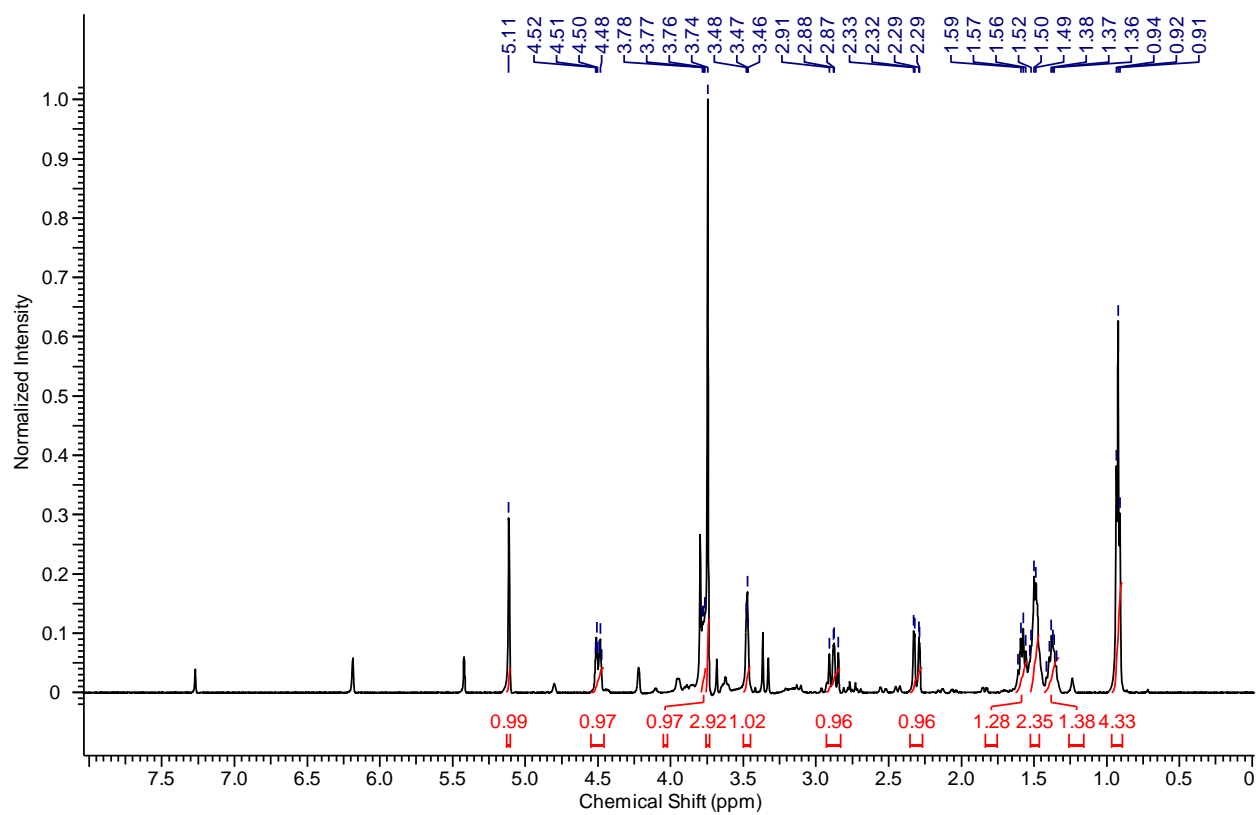

**Figure S24:**  $^1\text{H}$ -NMR spectrum (500 MHz,  $\text{CDCl}_3$ ) for **3**

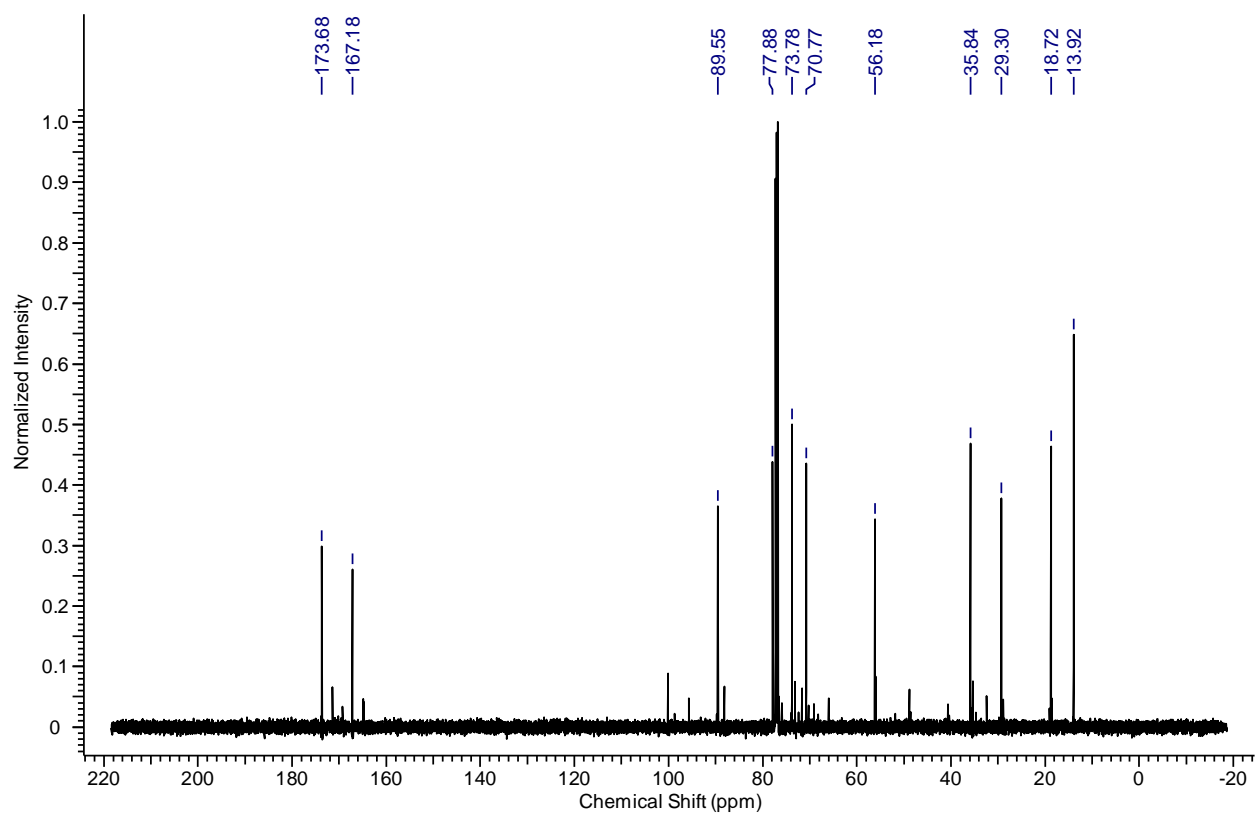

**Figure S25:**  $^{13}\text{C}$ -NMR spectrum (125 MHz,  $\text{CDCl}_3$ ) for **3**

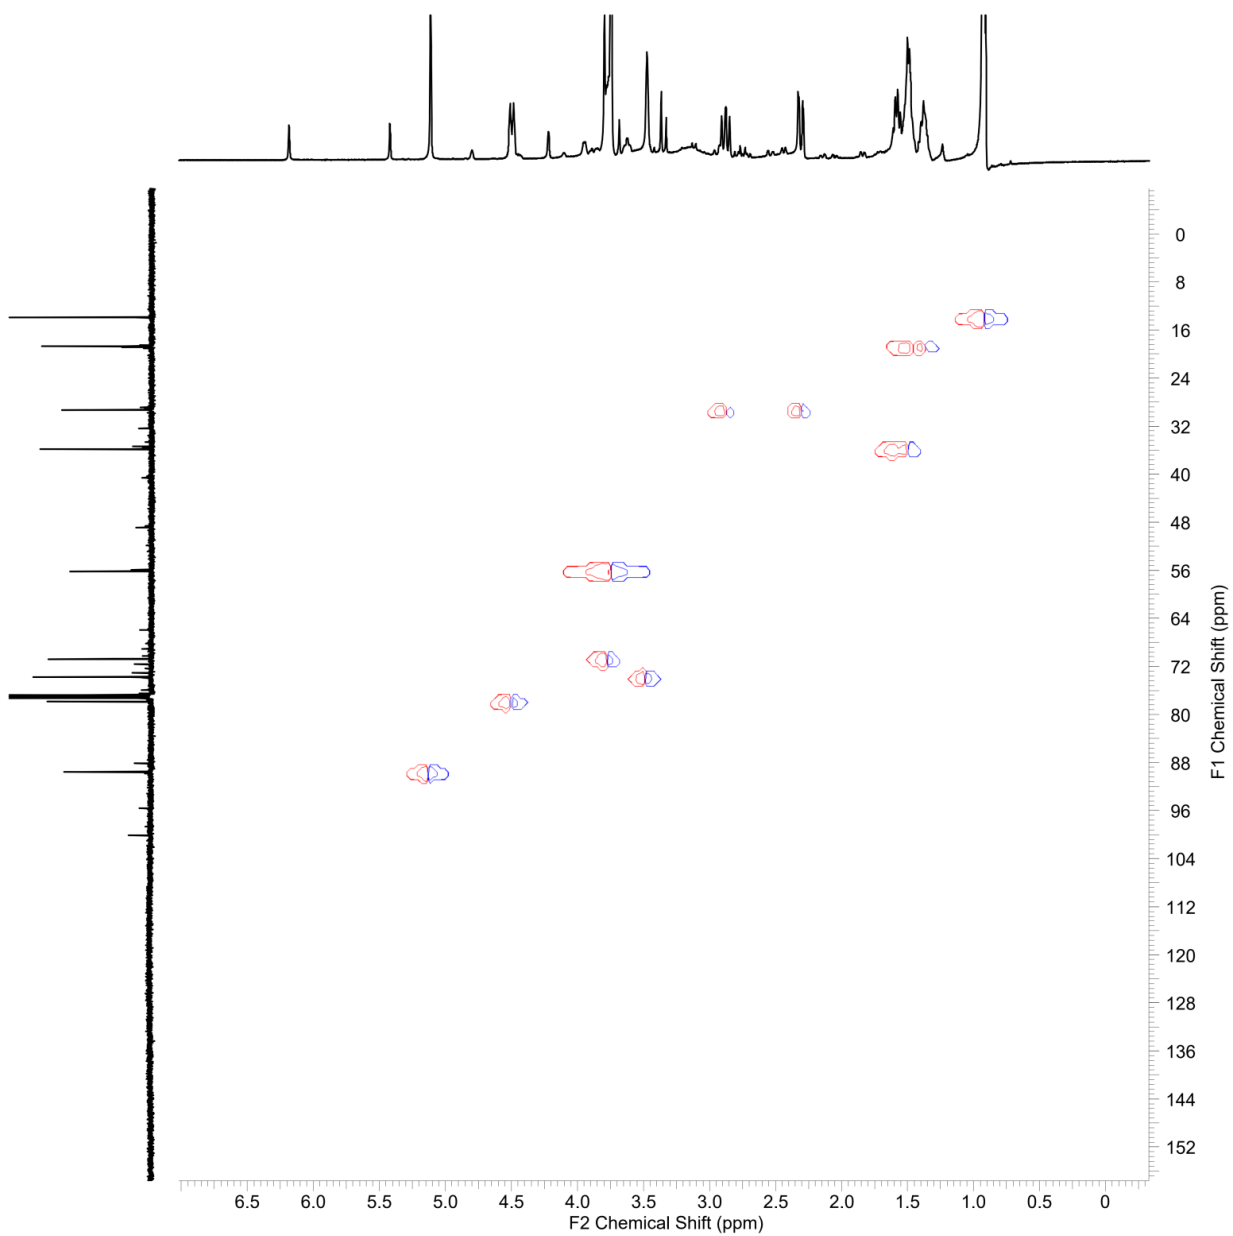

**Figure S26:** HSQC spectrum (CDCl<sub>3</sub>) for **3**

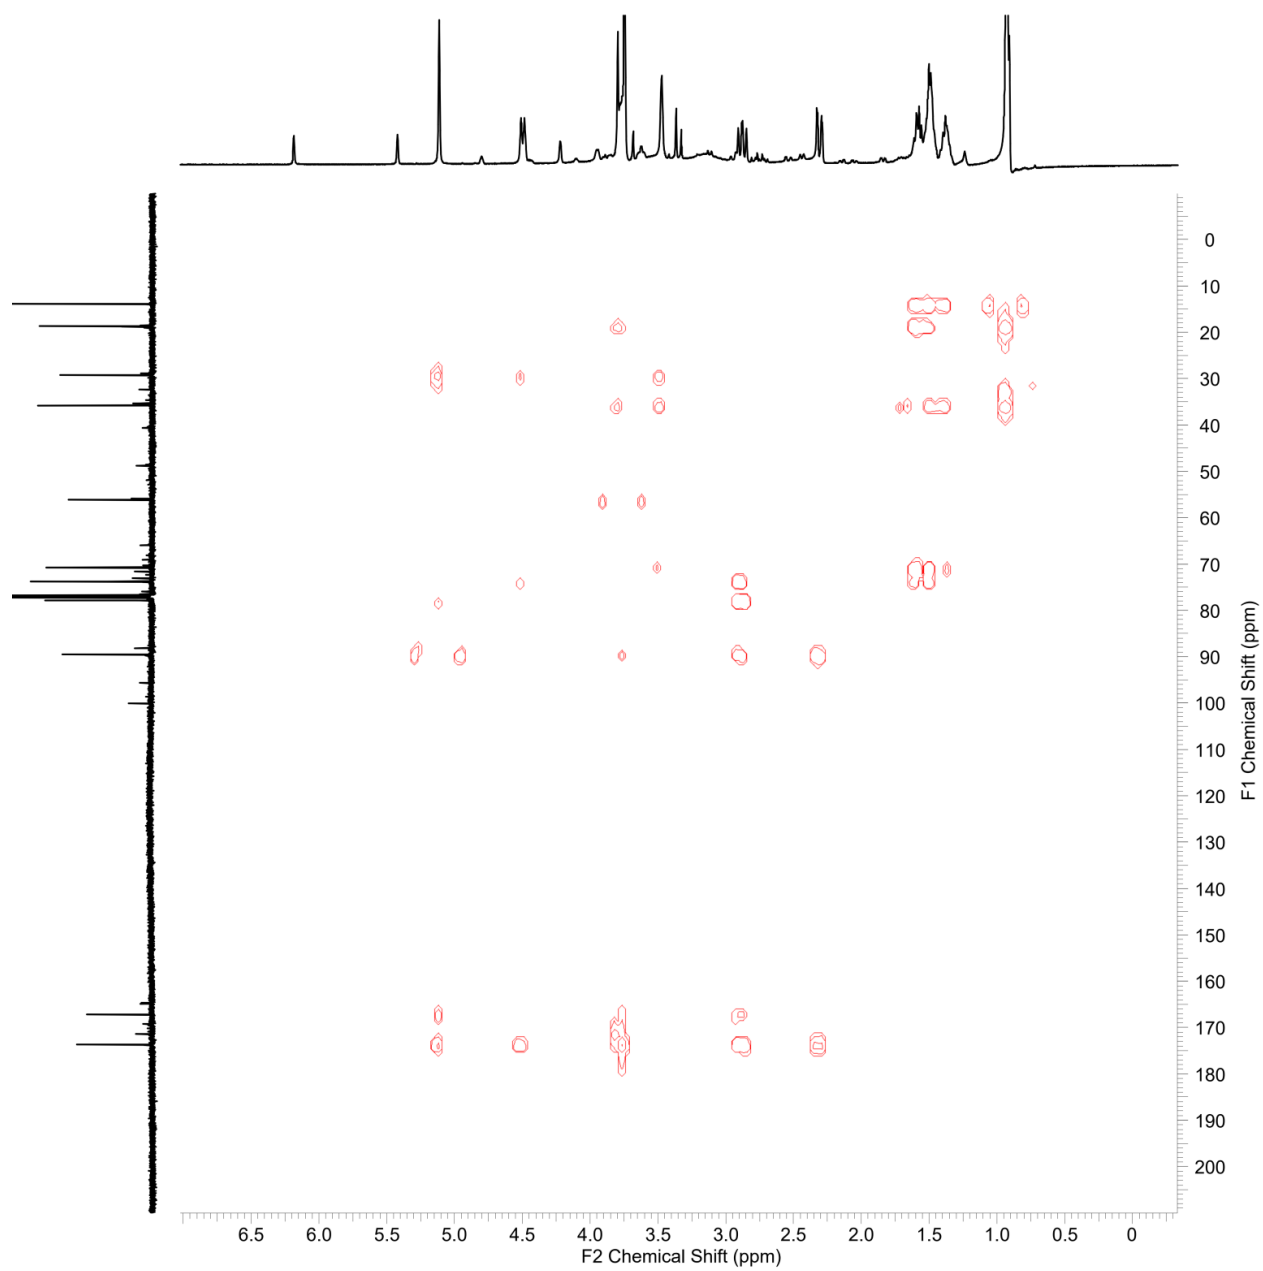

**Figure S27:** HMBC spectrum (CDCl<sub>3</sub>) for **3**

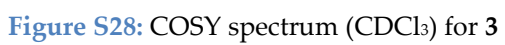

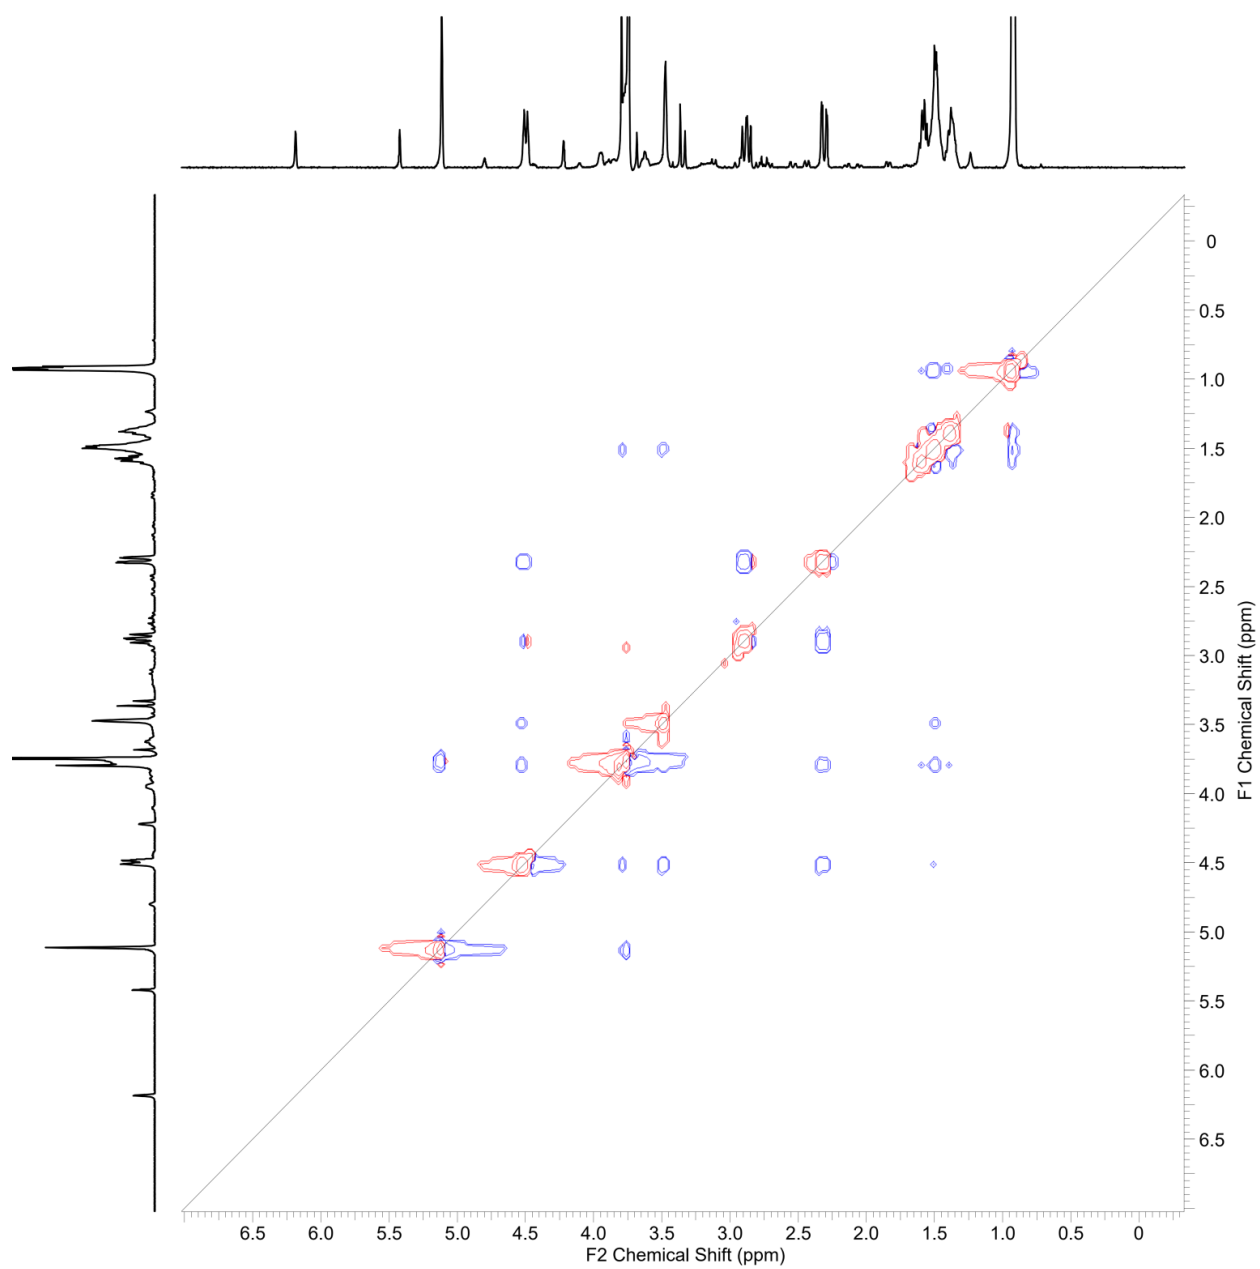

**Figure S29:** NOESY spectrum (CDCl<sub>3</sub>) for **3**

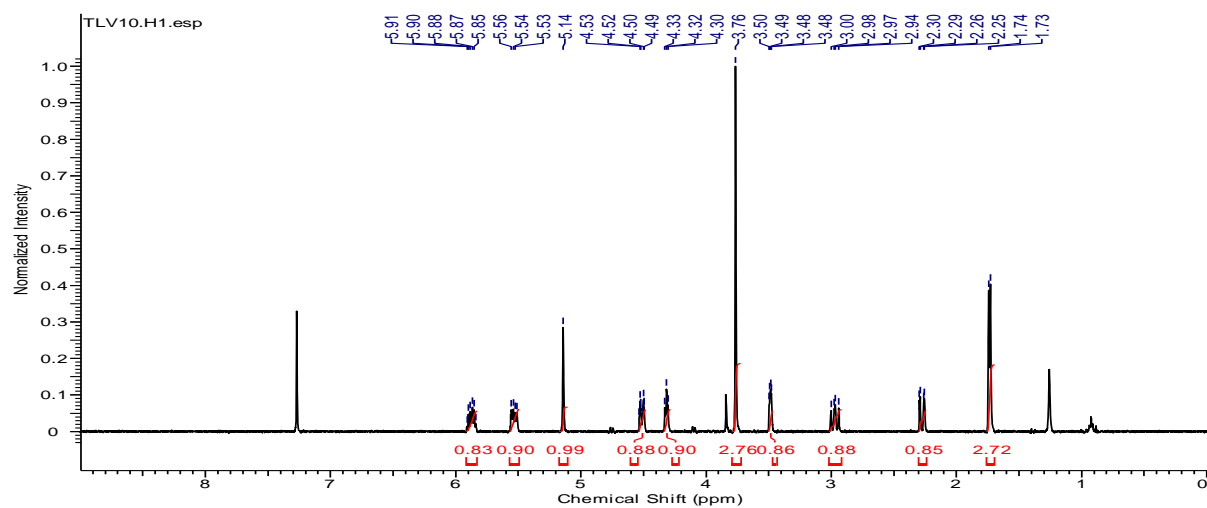

Figure S30:  $^1\text{H}$ -NMR spectrum (500 MHz,  $\text{CDCl}_3$ ) for 4

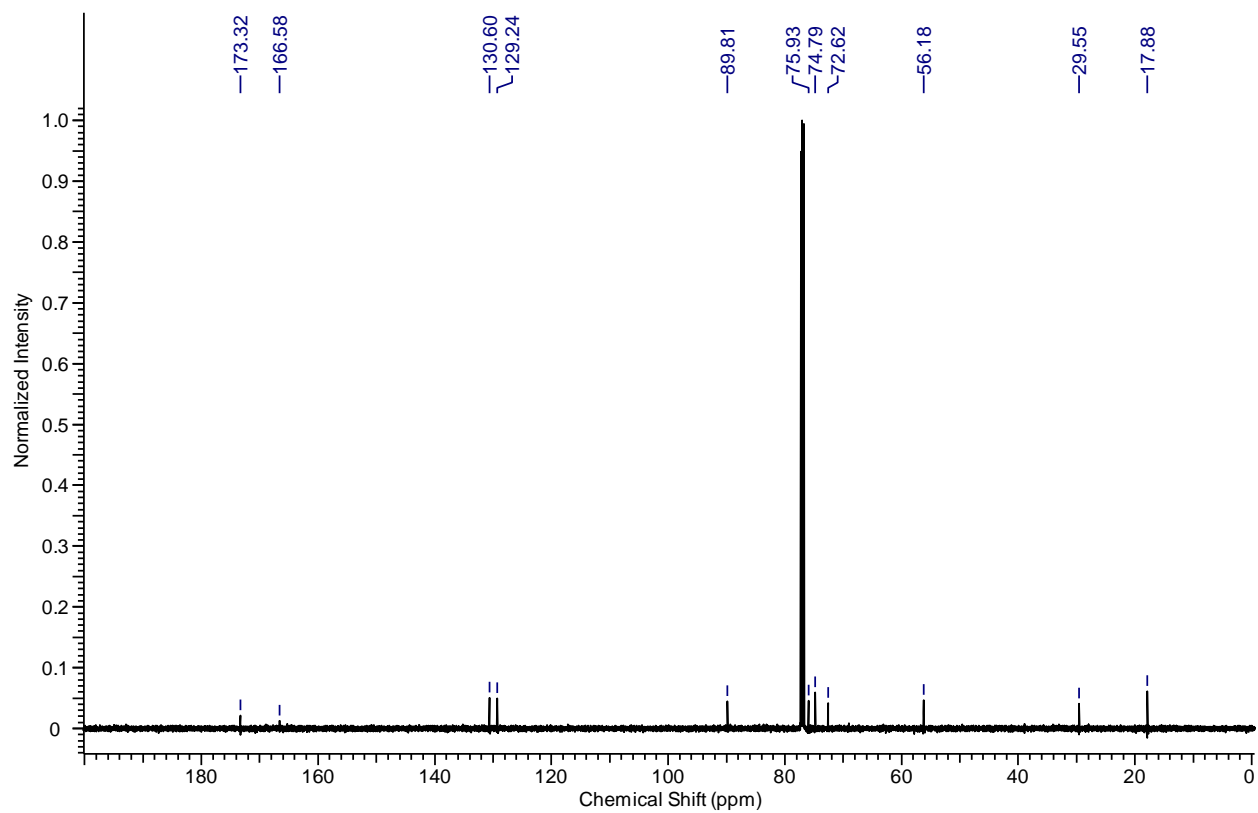

Figure S31:  $^{13}\text{C}$ -NMR spectrum (125 MHz,  $\text{CDCl}_3$ ) for 4

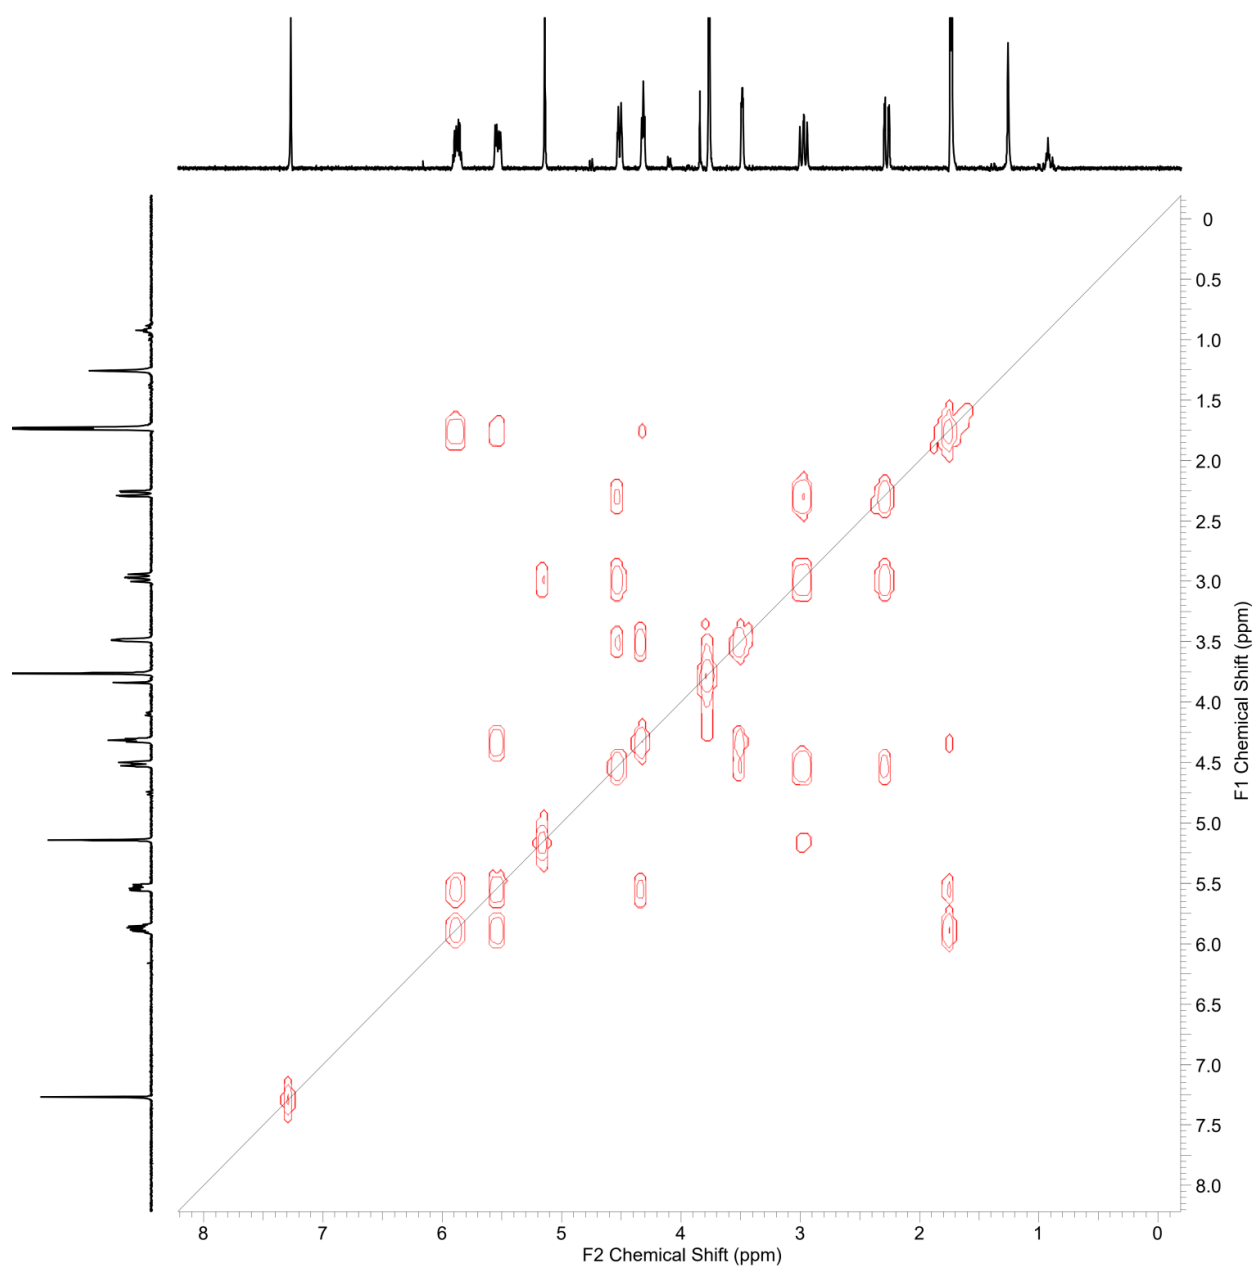

**Figure S32:** COSY spectrum (CDCl<sub>3</sub>) for **4**

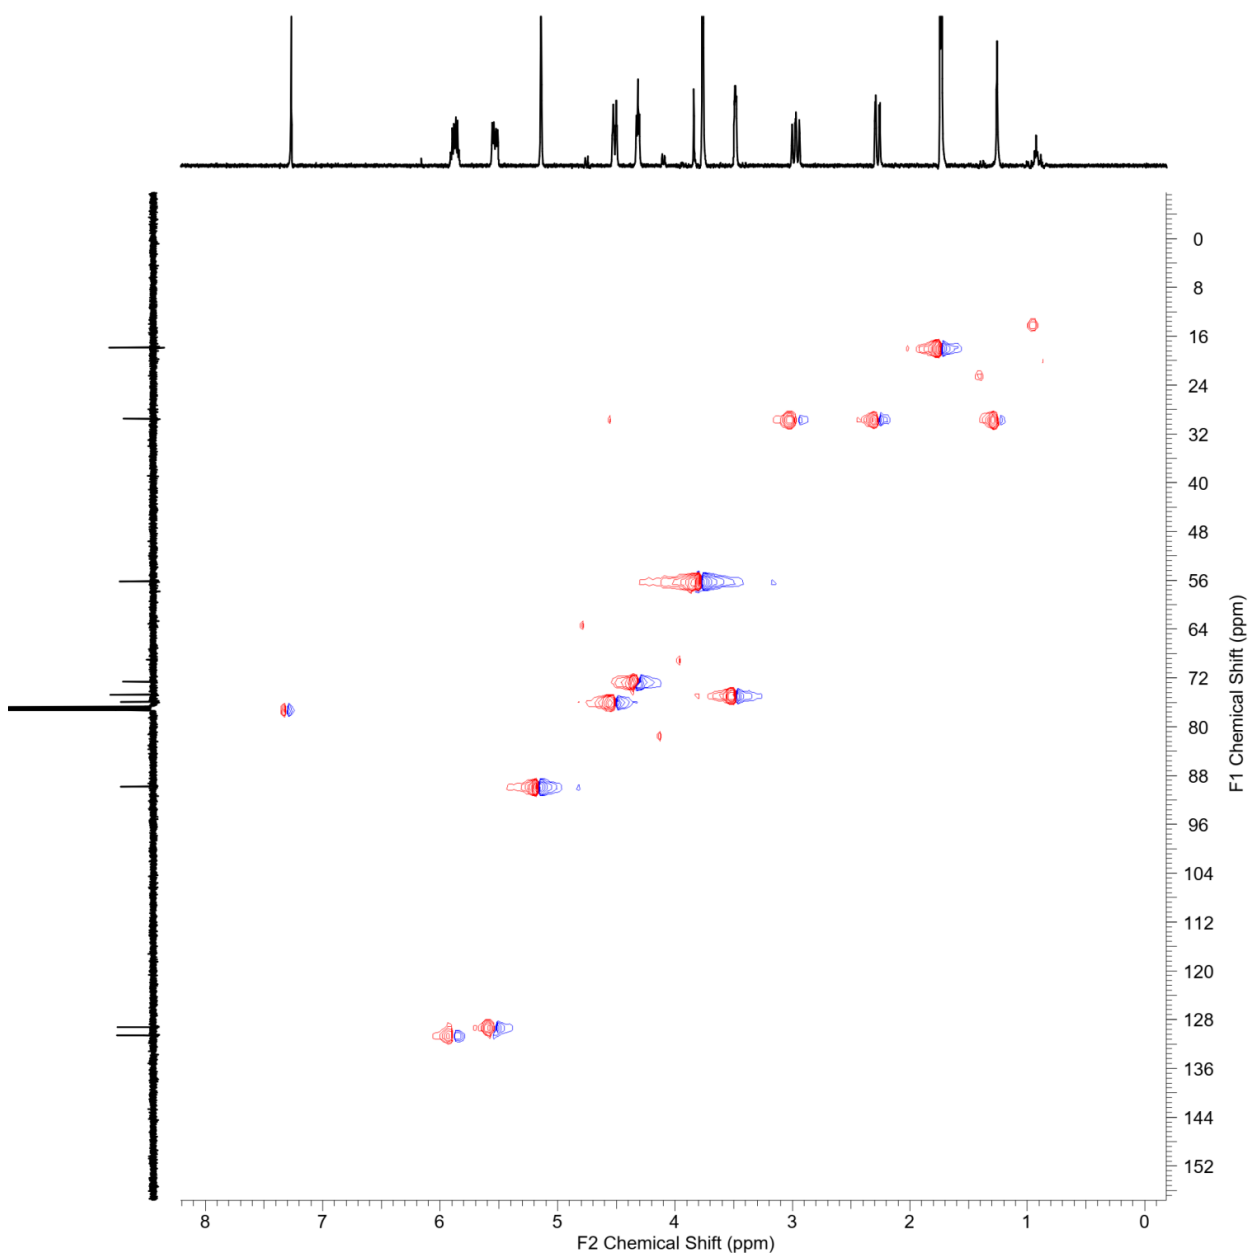

**Figure S33:** HSQC spectrum (CDCl<sub>3</sub>) for **4**

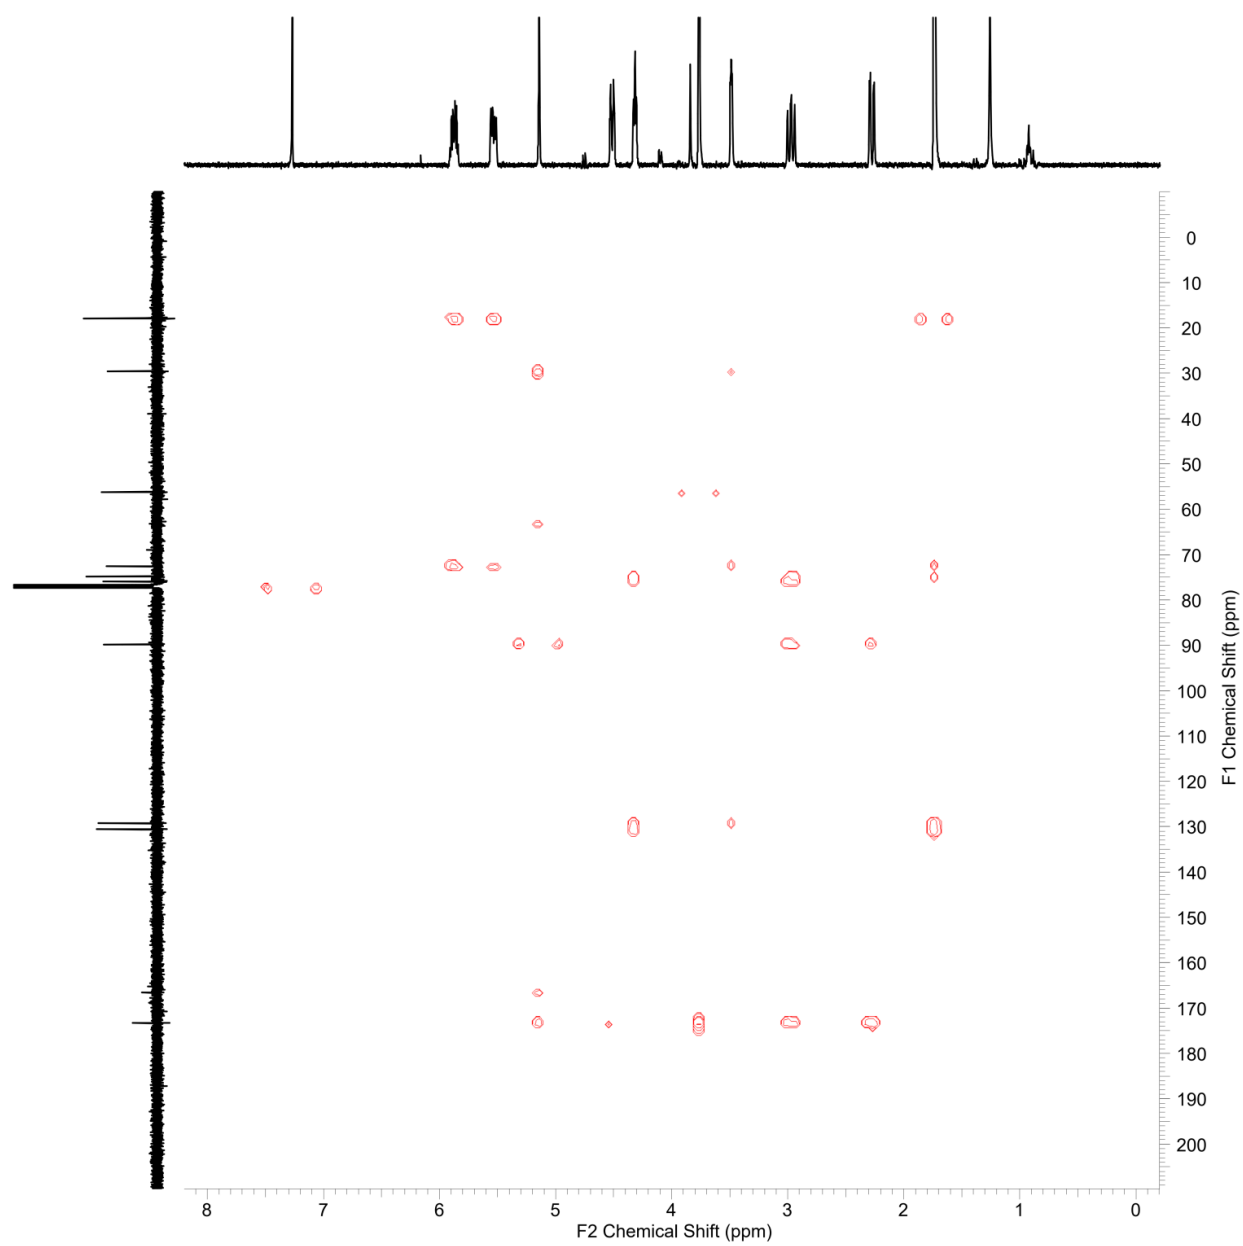

**Figure S34:** HMBC spectrum (CDCl<sub>3</sub>) for **4**

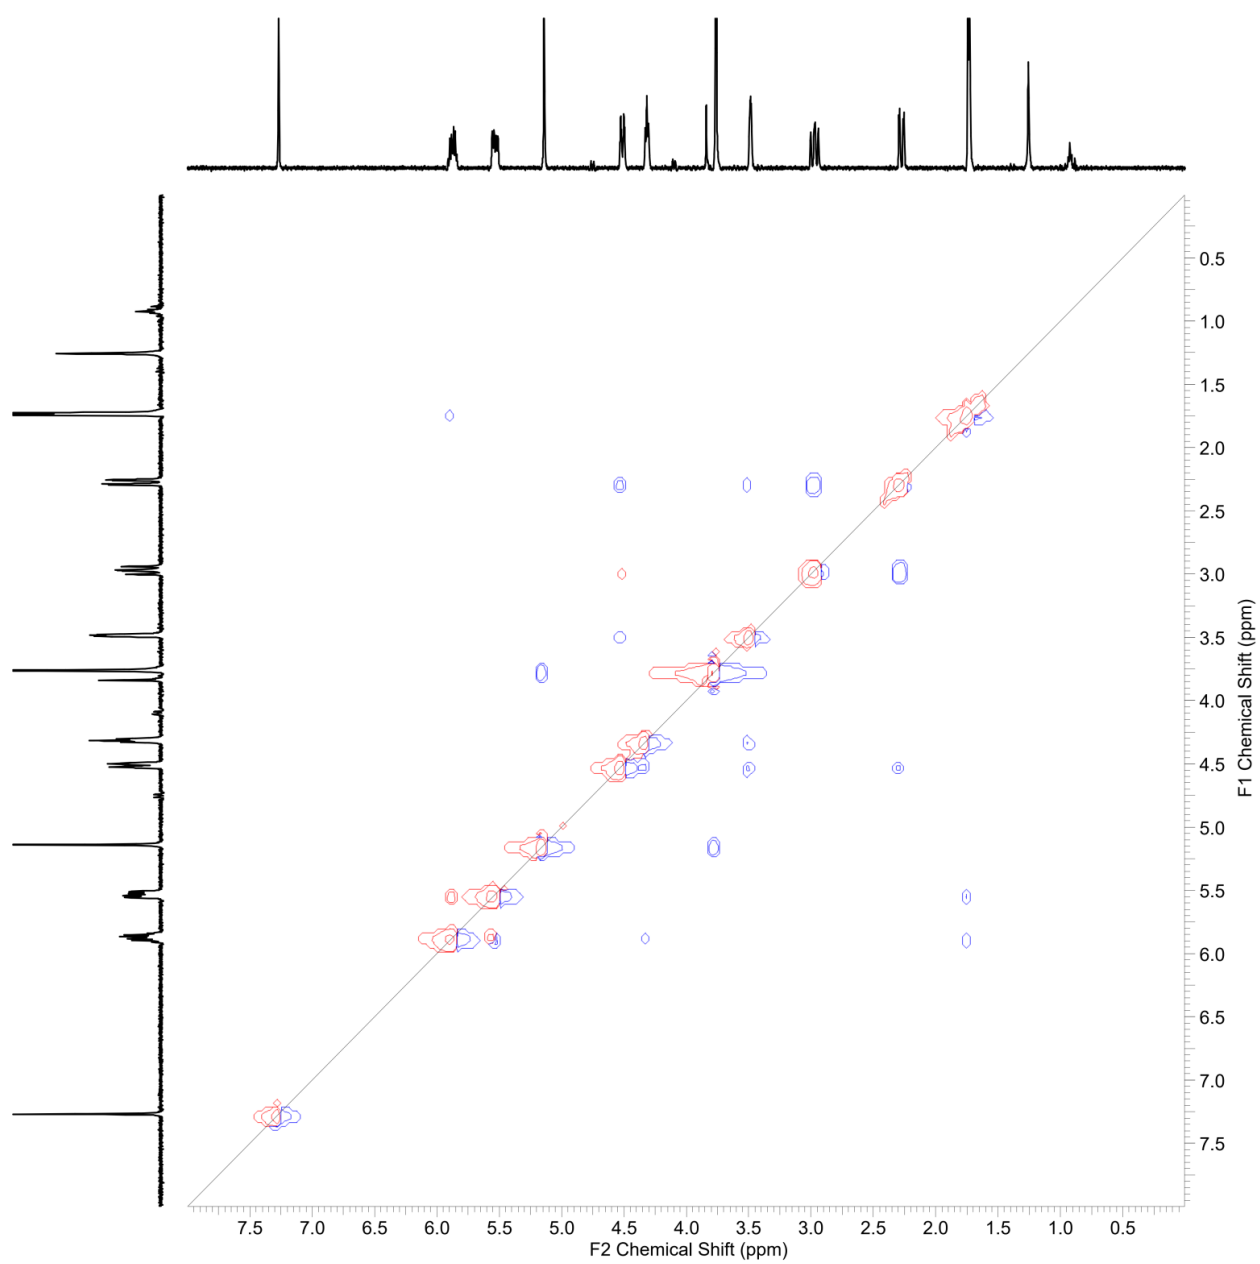

**Figure S35:** NOESY spectrum (CDCl<sub>3</sub>) for **4**

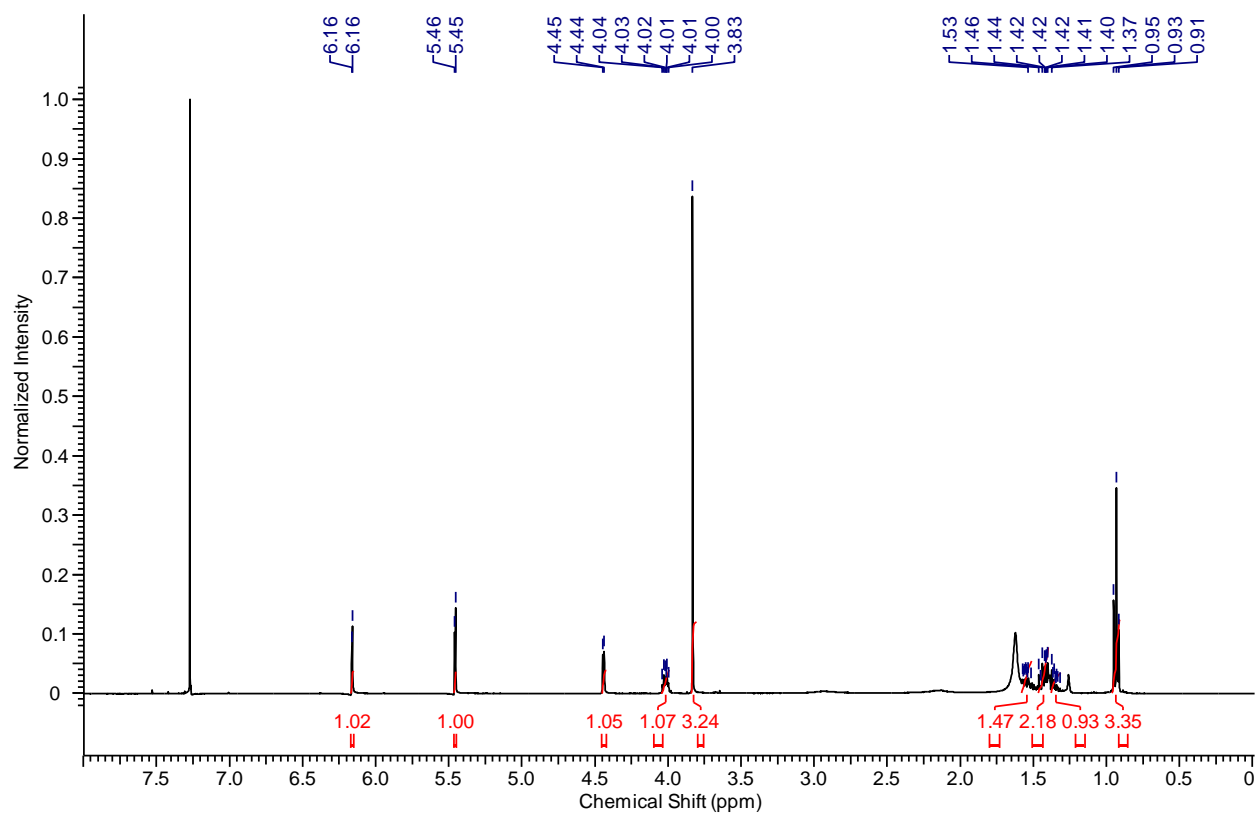

**Figure S36:**  $^1\text{H}$ -NMR spectrum (500 MHz,  $\text{CDCl}_3$ ) for **5**

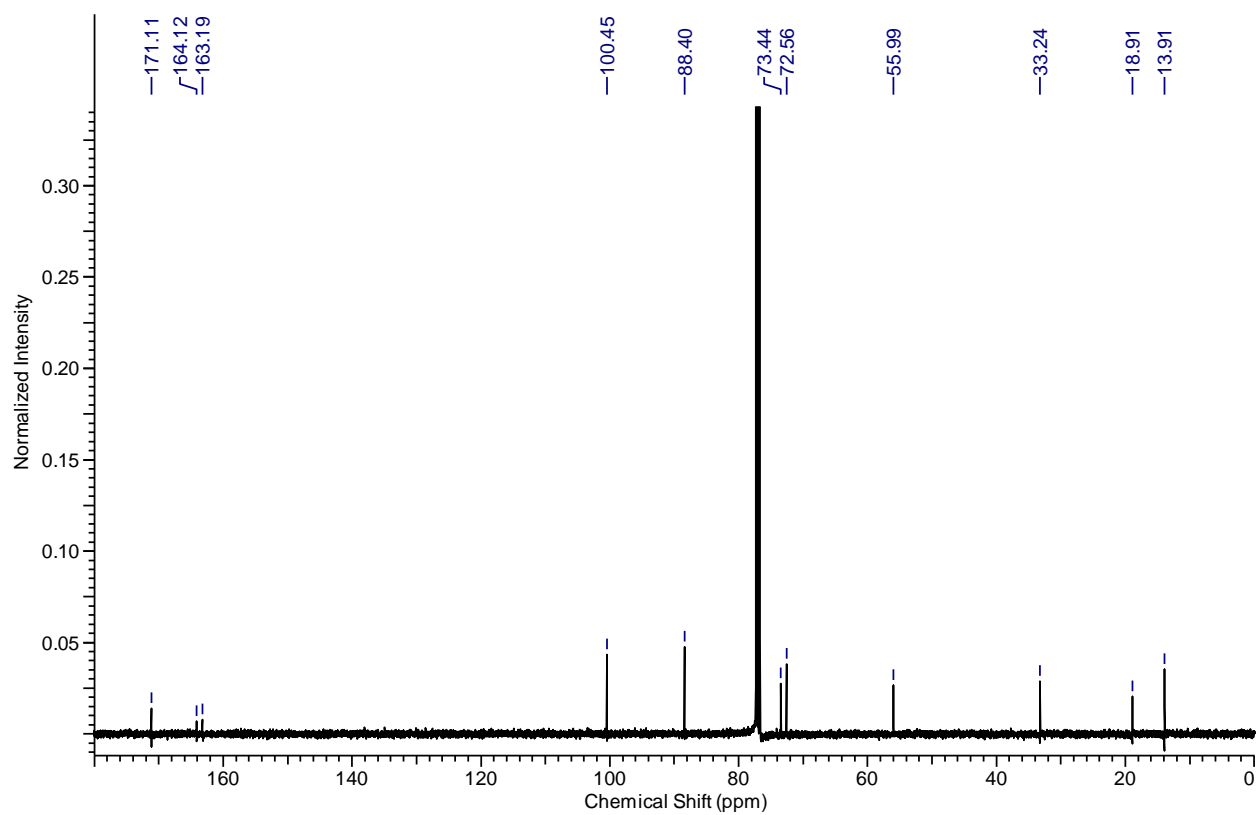

**Figure S37:**  $^{13}\text{C}$ -NMR spectrum (125 MHz,  $\text{CDCl}_3$ ) for **5**

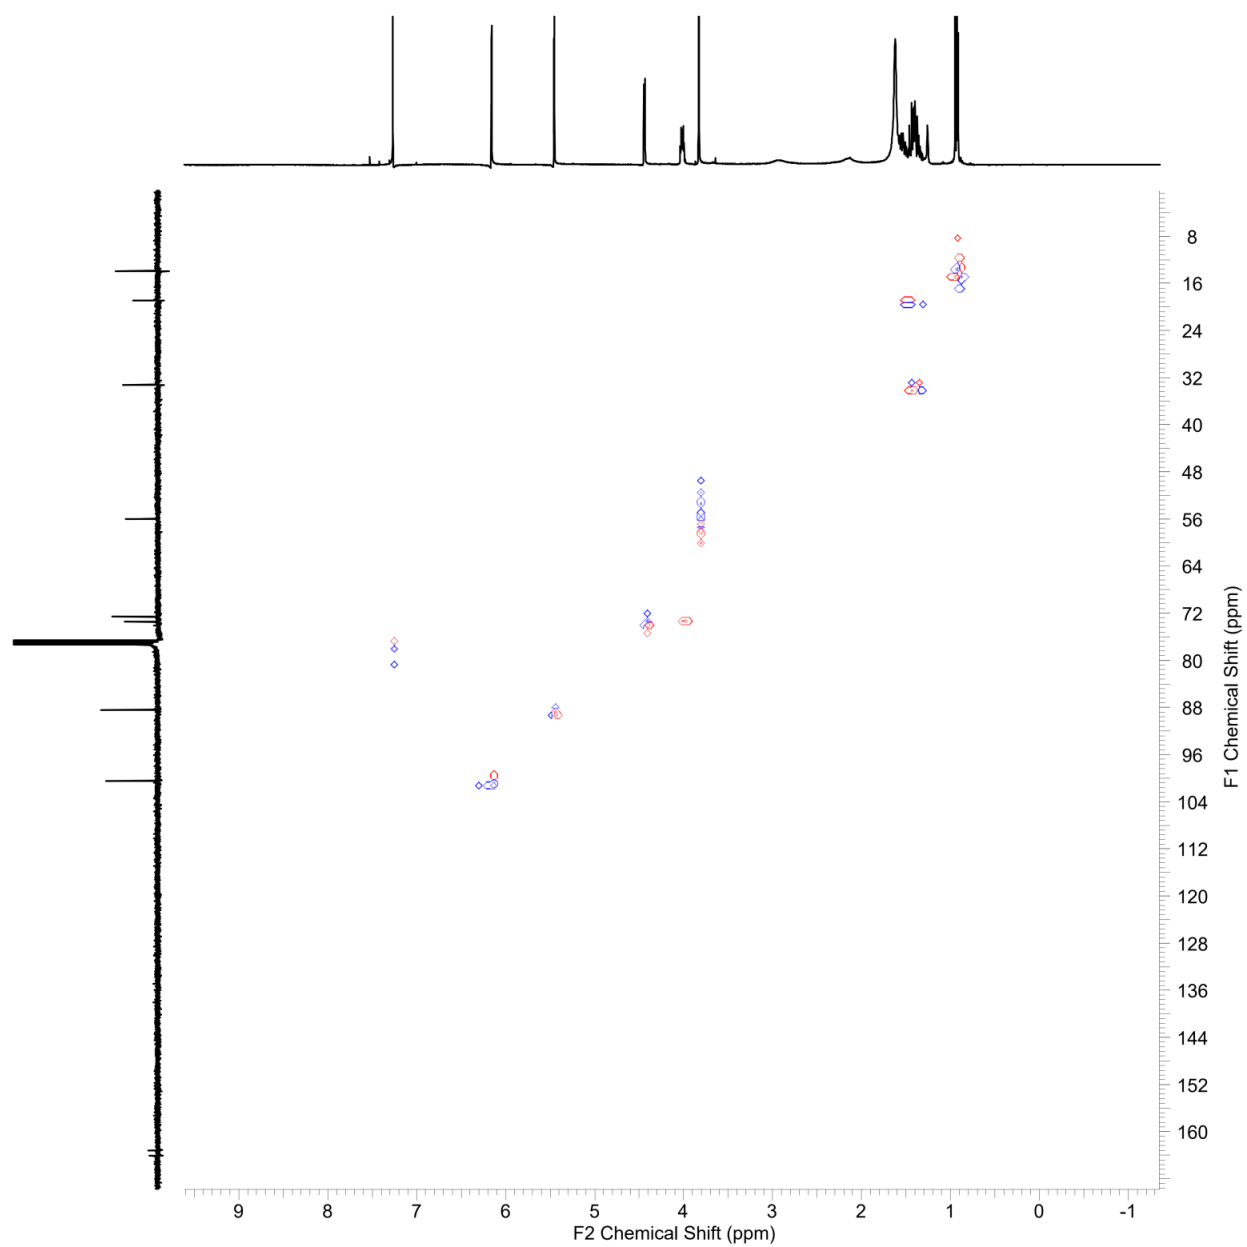

**Figure S38:** HSQC spectrum (CDCl<sub>3</sub>) for 5

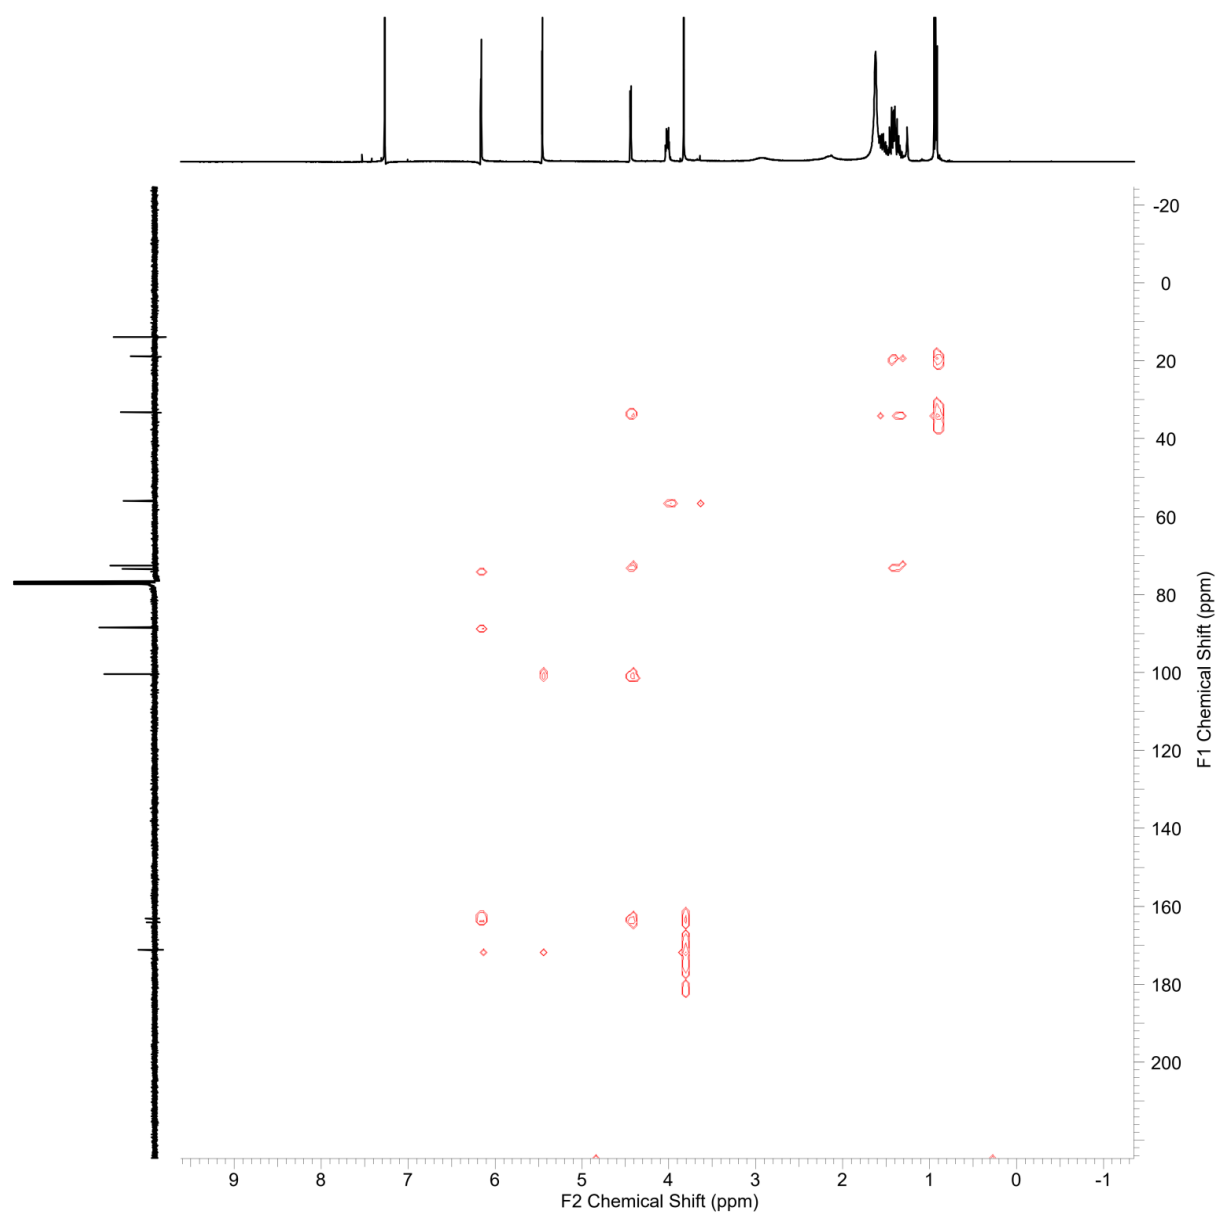

**Figure S39:** HMBC spectrum (CDCl<sub>3</sub>) for **5**

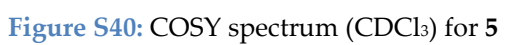

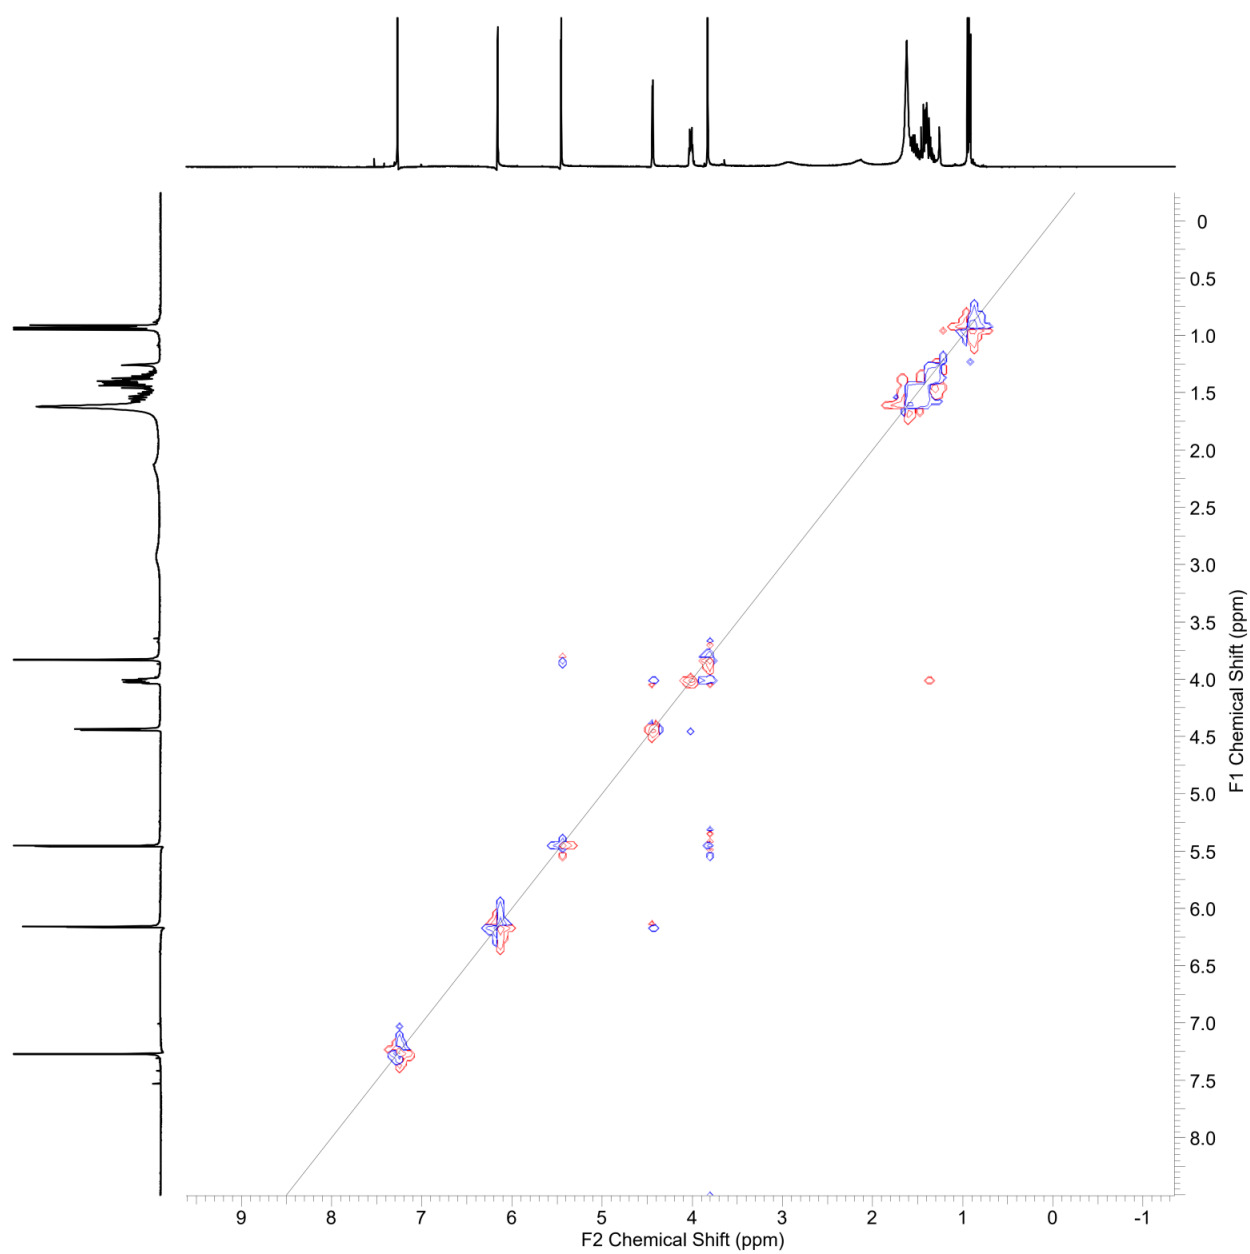

**Figure S41:** NOESY spectrum (CDCl<sub>3</sub>) for **5**

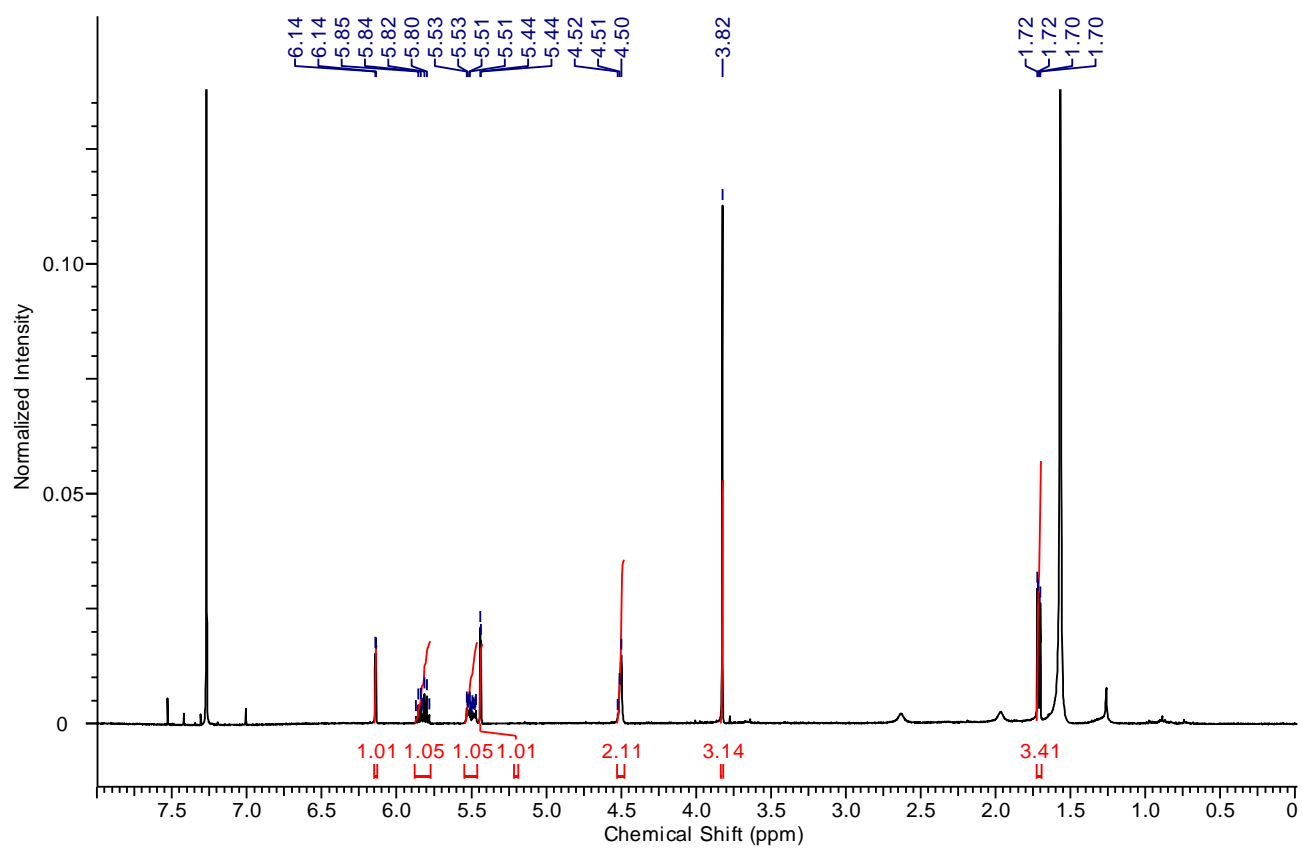

**Figure S42:** <sup>1</sup>H-NMR spectrum (500 MHz, CDCl<sub>3</sub>) for **6**

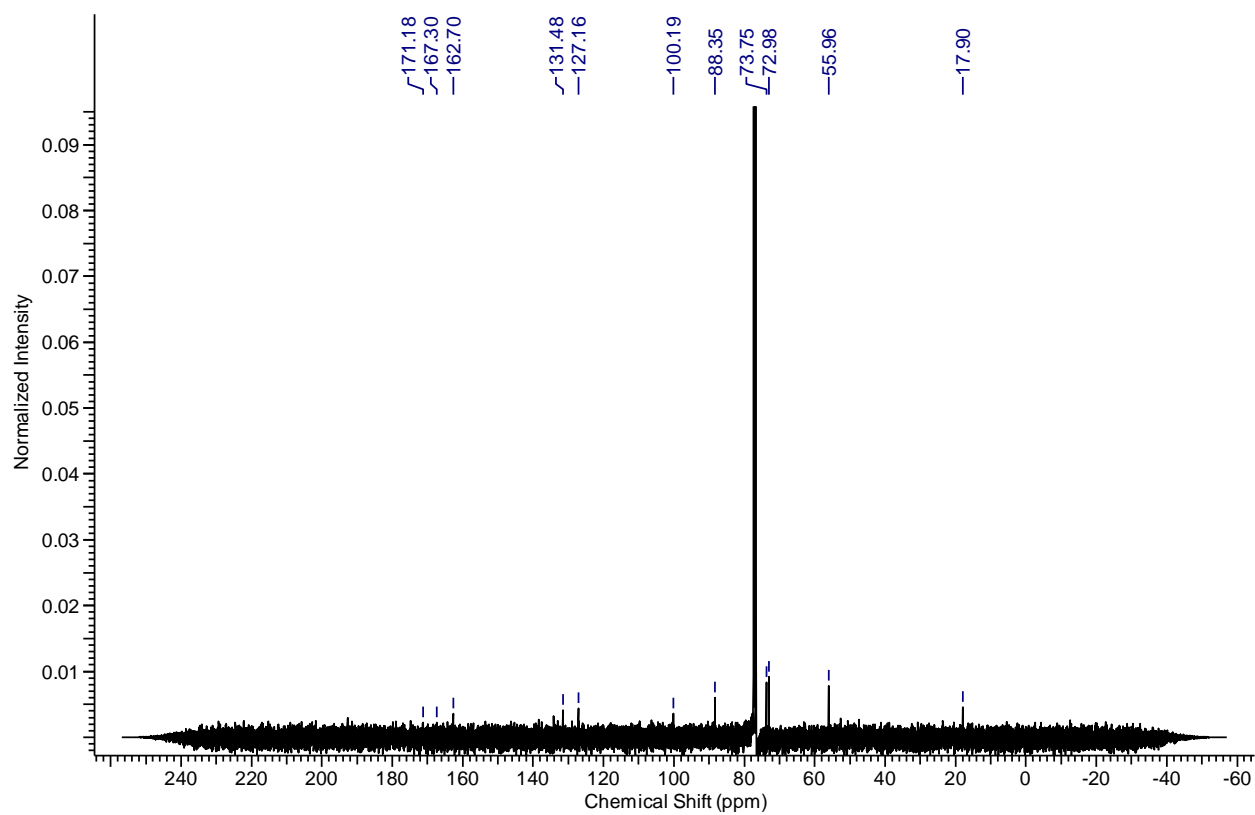

**Figure S43:** <sup>13</sup>C-NMR spectrum (125 MHz, CDCl<sub>3</sub>) for 6

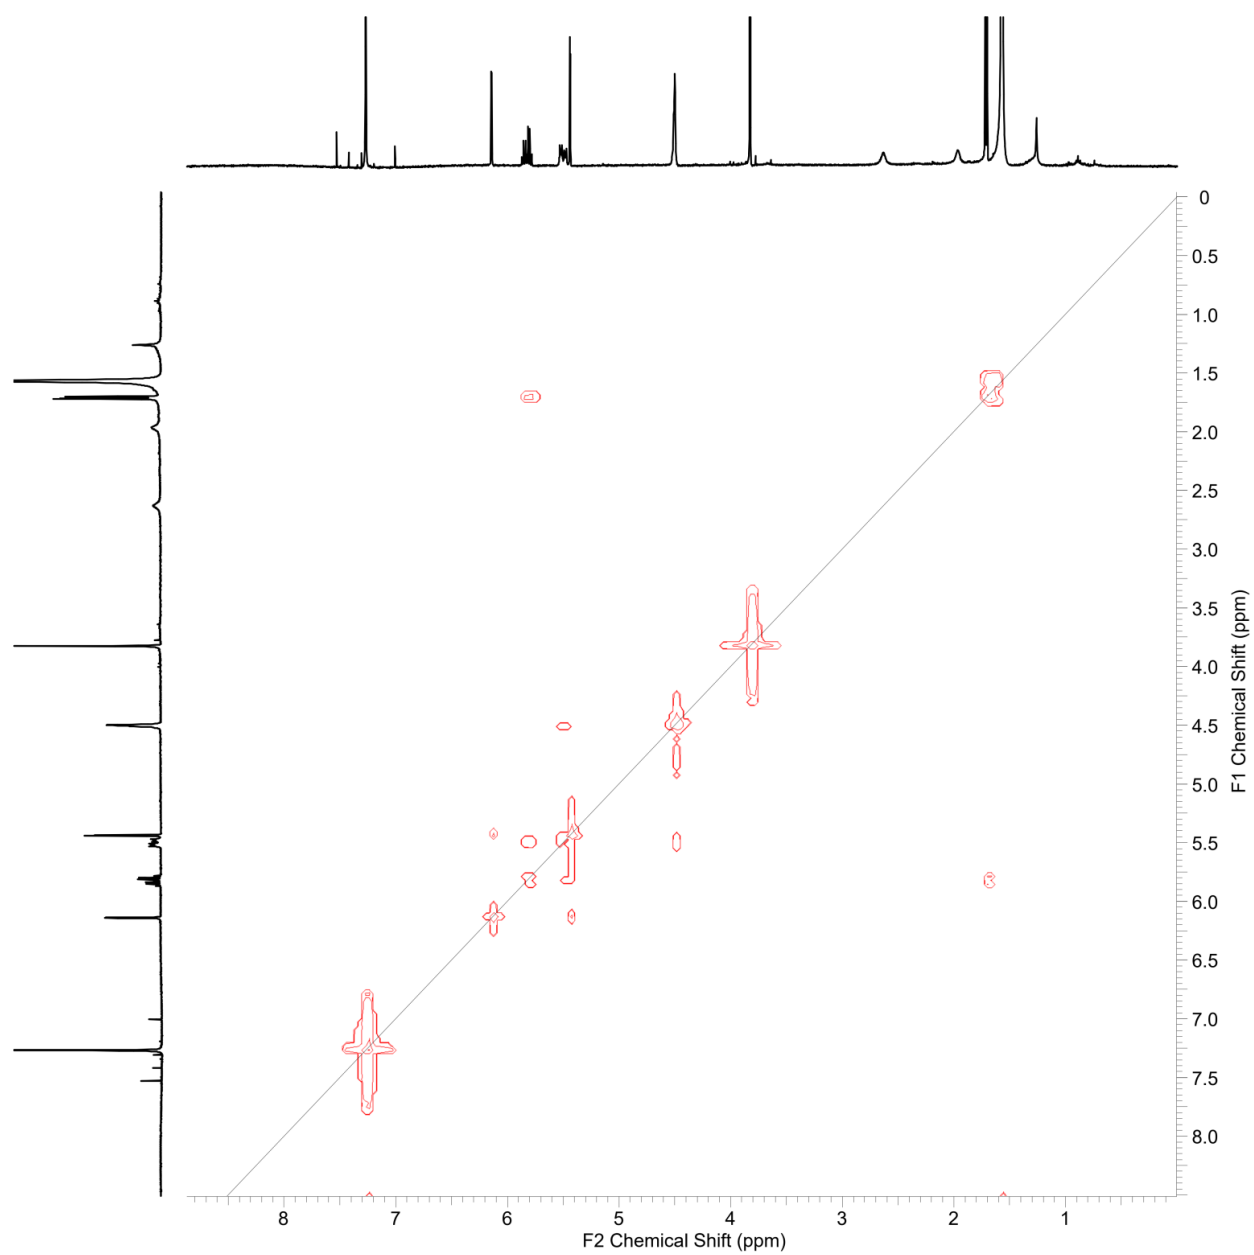

**Figure S44:** COSY spectrum (CDCl<sub>3</sub>) for **6**

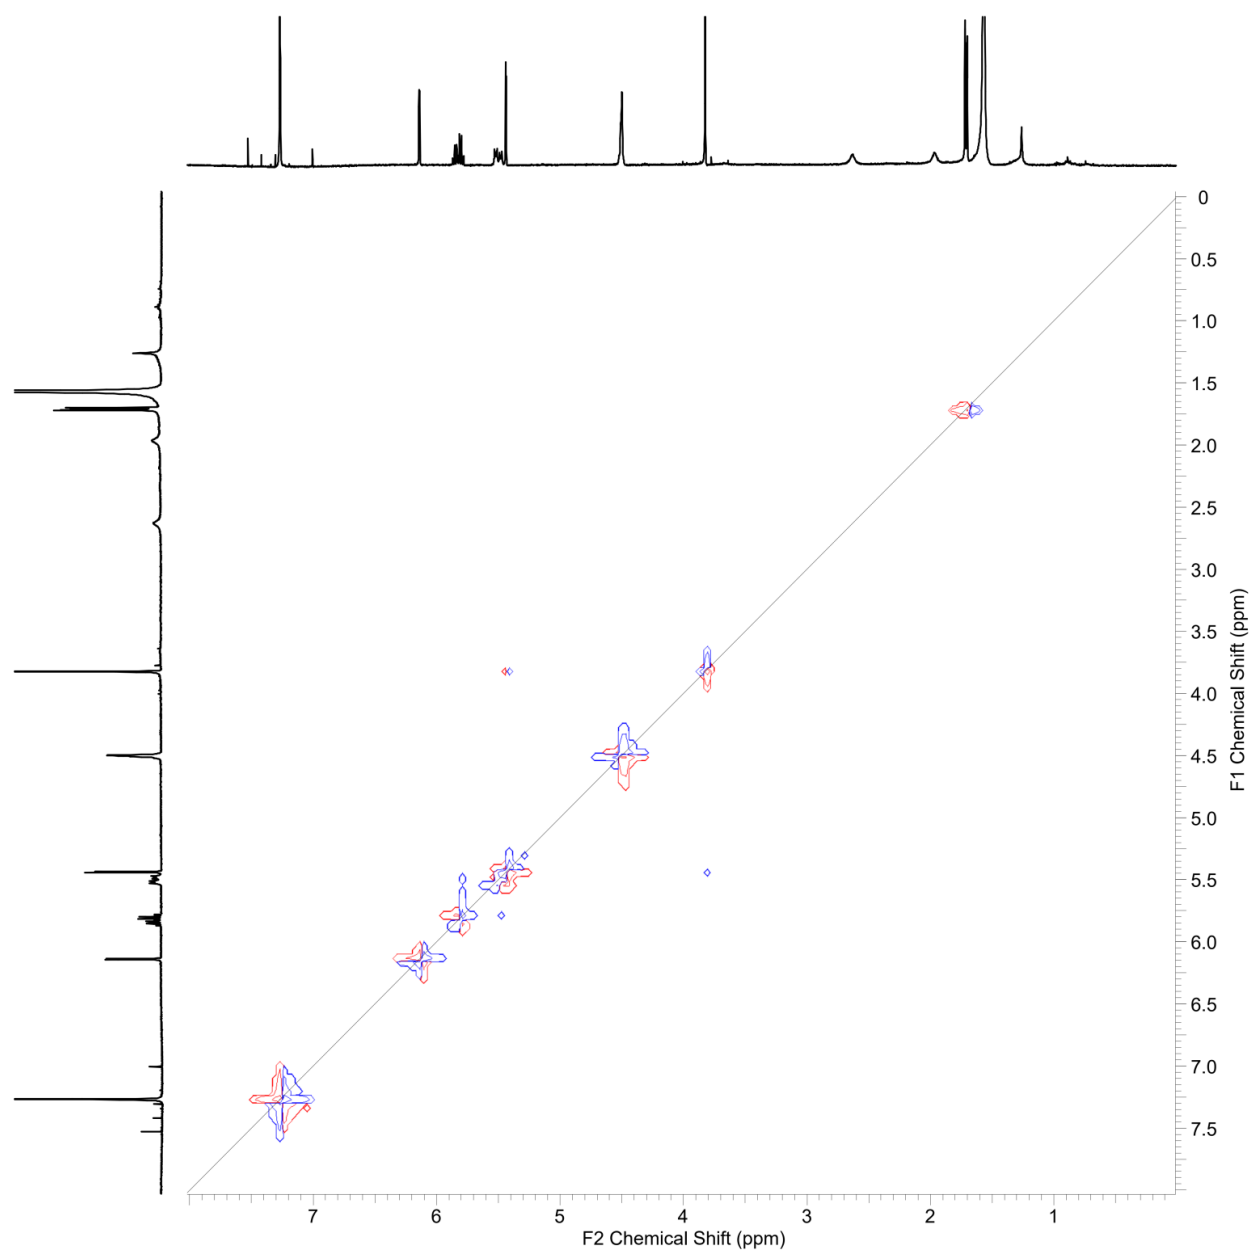

Figure S45: NOESY spectrum (CDCl<sub>3</sub>) for 6

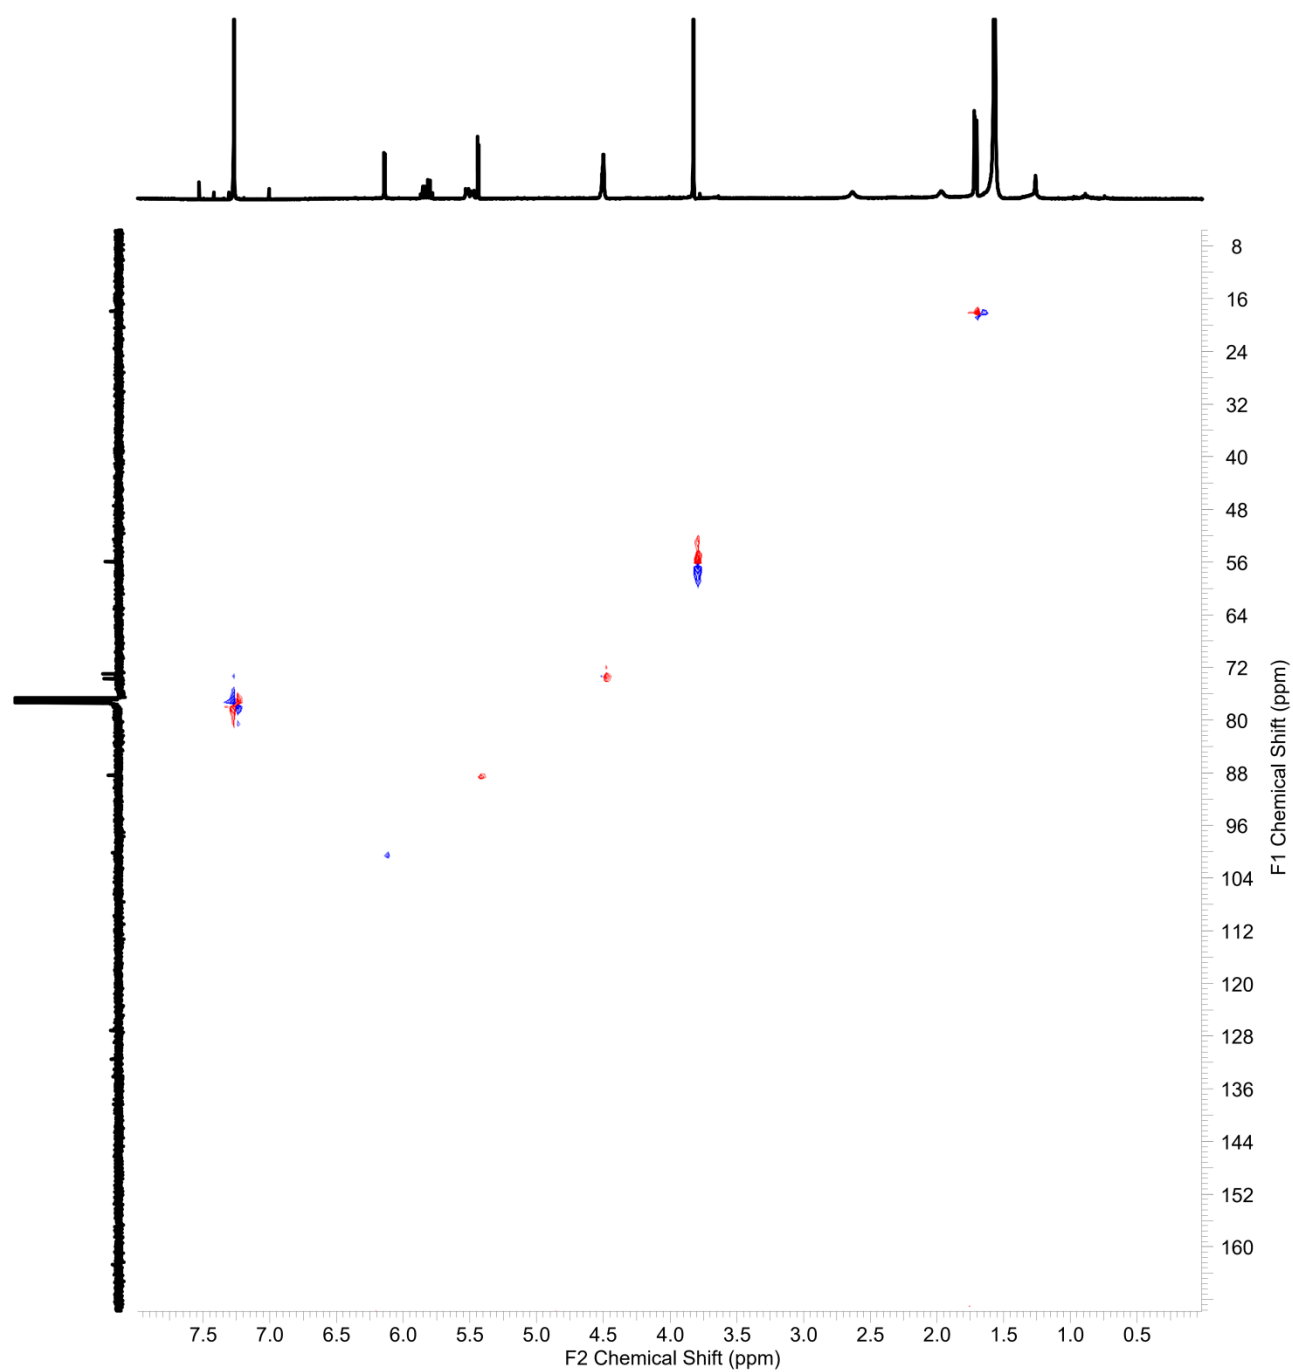

Figure S46: HSQC spectrum (CDCl<sub>3</sub>) for 6

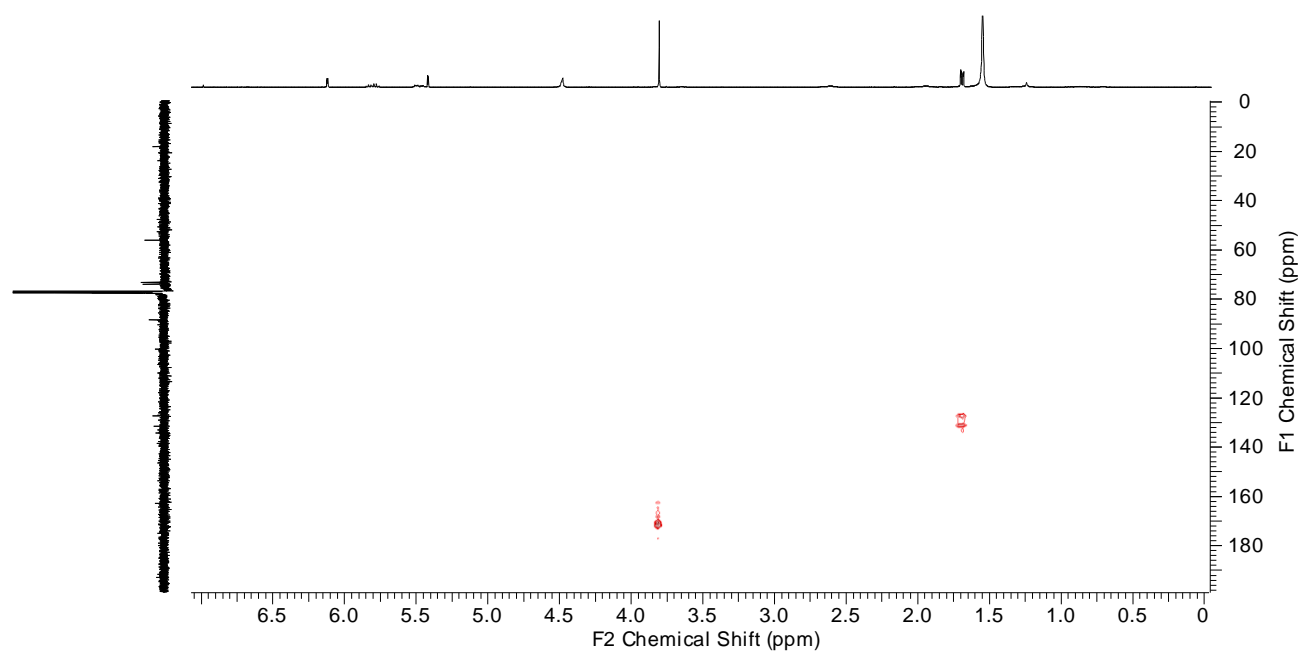

**Figure S47:** HMBC spectrum (CDCl<sub>3</sub>) for **6**

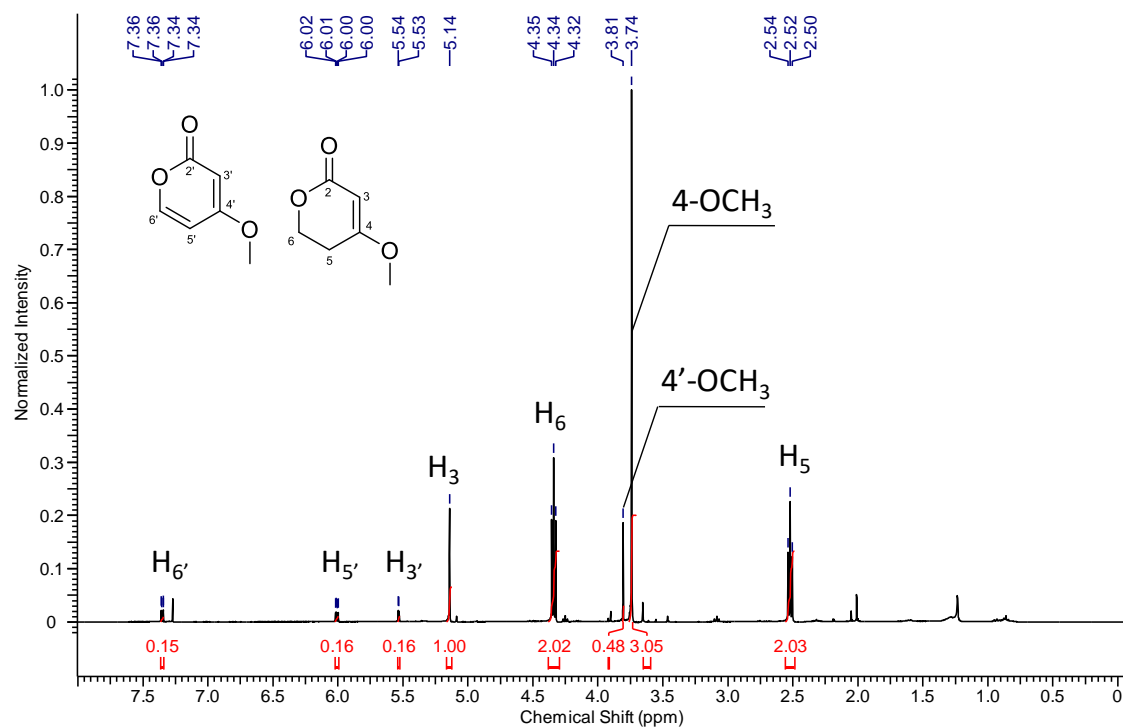

**Figure S48:**  $^1\text{H}$ -NMR spectrum (500 MHz,  $\text{CDCl}_3$ ) for 7-8

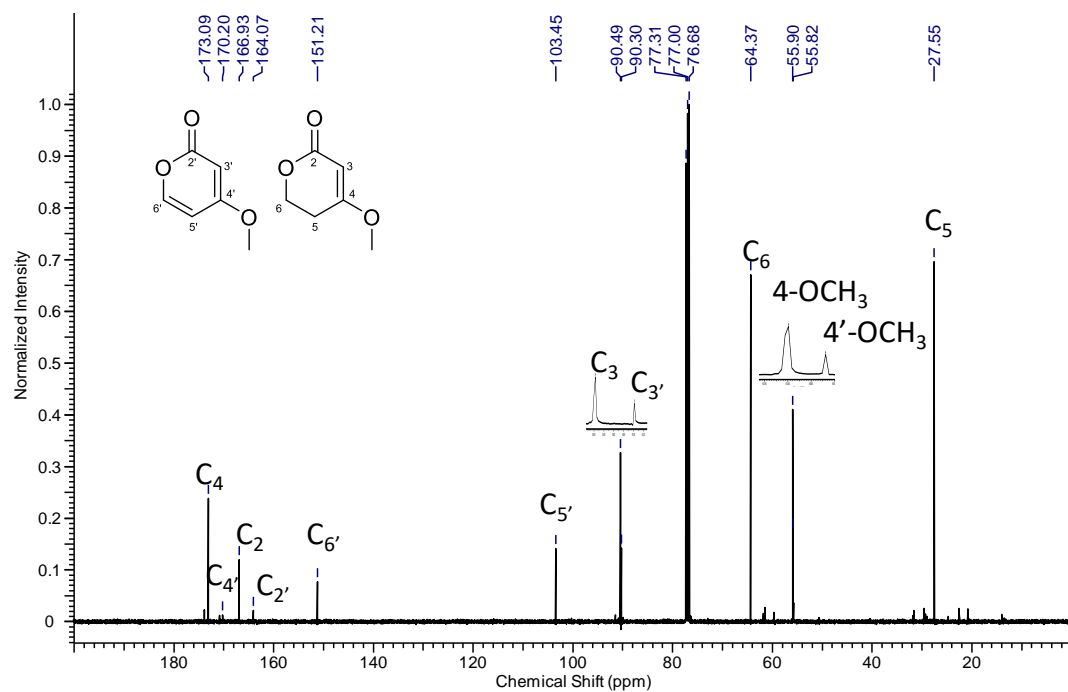

**Figure S49:**  $^{13}\text{C}$ -NMR spectrum (125 MHz,  $\text{CDCl}_3$ ) for 7-8

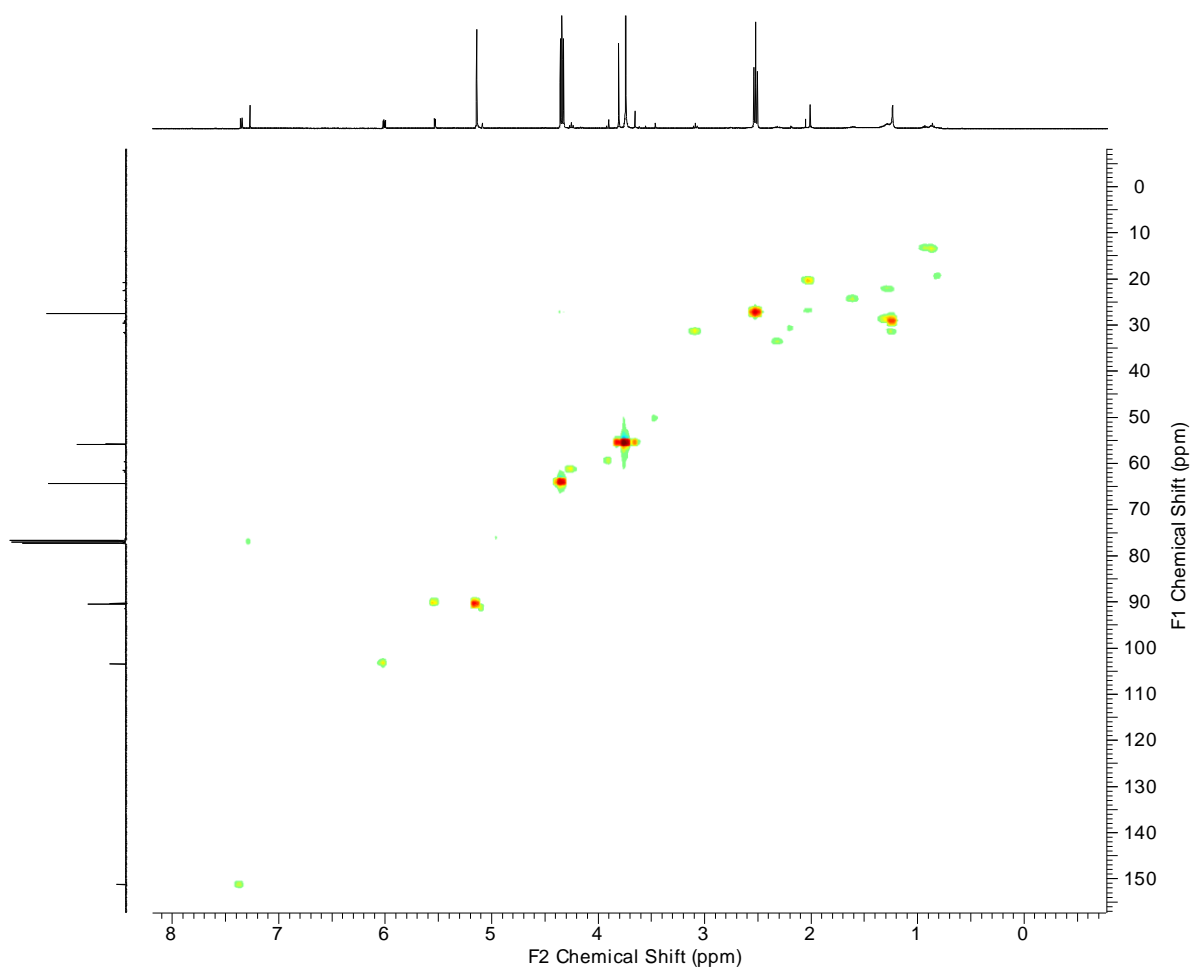

**Figure S50:** HSQC spectrum (CDCl<sub>3</sub>) for 7-8

## References

1. Isaac, B.G.; Ayer, S.W.; Stonard, R.J. Arabenoic acid, a natural product herbicide of fungal origin. *J. Antibiot.* **1991**, *44*, 793–794.
2. Larsen, T.O.; Frisvad, J.C.; Christophersen, C. Arabenoic acid (verrucolone), a major chemical indicator of *Penicillium verrucosum*. *Biochem. Syst. Ecol.* **1998**, *26*, 463–465.
3. Gorst-Allman, C.P.; Steyn, P.S. Biosynthesis of 5,6-dihydro-4-methoxy-2H-pyran-2-one in *Penicillium italicum*. *S. Afr. j. chem.* **1983**, *36*, 83–84.
4. Kimura, Y.; Tamura, S. Isolation and structure of Pestalotin, a gibberellin synergist from *Pestalotia cryptomeriaeicola*. *Agric. Biol. Chem.* **1972**, *36*, 1925–1930.
5. Ellestad, G.A.; McGahren, W.J.; Kunstmann, M.P. Structure of a new fungal lactone, LL-P880 $\alpha$ , from an unidentified *Penicillium* sp. *J. Org. Chem.* **1972**, *37*, 2045–2047.
6. Kimura, Y.; Hamasaki, T.; Nakajima, H. Stereochemistry and biological activities of LL-P880 $\gamma$ , a pestalotin analogue, produced by *Penicillium citreo-viride*. *Agric. Biol. Chem.* **1986**, *50*, 1649–1650.
7. Sakurai, I.; Shimizu, S.; Yamamoto, Y. Studies on metabolites of *Macrophoma commelinae*. III. : Isolation of new metabolites and biosynthesis of macommelin group. *Chem. Pharm. Bull.* **1988**, *36*, 1328–1335.
8. Evidente, A.; Rodeva, R.; Andolfi, A.; Stoyanova, Z.; Perrone, C.; Motta, A. Phytotoxic polyketides produced by *Phomopsis foeniculi*, a strain isolated from diseased Bulgarian fennel. *Eur J Plant Pathol* **2011**, *130*, 173–182.
9. Ayer, W.A.; Trifonov, L.S.; Hutchison, L.J.; Chakravarty, P. Metabolites from a wood-Inhabiting cup fungus, *Urnula craterium*. *Nat. Prod. Lett.* **2000**, *14*, 405–410.
10. Kimura, Y.; McGahren, W.J.; Suzuki, A.; Tamura, S. Structure of a New Fungal Pyrone, from an Unidentified *Penicillium* sp. *Agric. Biol. Chem.* **1978**, *42*, 1625–1626.
11. Nose, H.; Seki, A.; Yaguchi, T.; Hosoya, A.; Sasaki, T.; Hoshiko, S.; Shomura, T. PF1163A and B, new antifungal antibiotics produced by *Penicillium* sp. *J. Antibiot.* **2000**, *53*, 33–37.
12. Sakai, K.; Chiba, H.; Kaneto, R.; Sakamoto, M.; Okamura, K.; Tone, H. Mer-NF8054A and X, Novel antifungal steroids, isolated from *Aspergillus* sp. *J. Antibiot.* **1994**, *47*, 591–594.
13. Zhou, G.-X.; Wijeratne, E.M.K.; Bigelow, D.; Pierson, L.S.; VanEtten, H.D.; Gunatilaka, A.A.L. Aspochalasins I, J, and K: Three new cytotoxic cytochalasans of *Aspergillus flavipes* from the rhizosphere of *Ericameria laricifolia* of the Sonoran Desert. *J. Nat. Prod.* **2004**, *67*, 328–332.
14. Minami, A.; Tajima, N.; Higuchi, Y.; Toyomasu, T.; Sassa, T.; Kato, N.; Dairi, T. Identification and functional analysis of brassicicene C biosynthetic gene cluster in *Alternaria brassicicola*. *Bioorg. Med. Chem. Lett.* **2009**, *19*, 870–874.
15. Kawahara, N.; Sekita, S.; Satake, M. Steroids from *Calvatia cyathiformis*. *Phytochemistry* **1994**, *37*, 213–215, doi:10.1016/0031-9422(94)85028-3.
16. Ngoc Quang, D.; Dinh Bach, D. Ergosta-4,6,8(14),22-tetraen-3-one from Vietnamese *Xylaria* sp. possessing inhibitory activity of nitric oxide production. *Nat. Prod. Res.* **2008**, *22*, 901–906.
17. Gao, N.; Shang, Z.-C.; Yu, P.; Luo, J.; Jian, K.-L.; Kong, L.-Y.; Yang, M.-H. Alkaloids from the endophytic fungus *Penicillium brefeldianum* and their cytotoxic activities. *Chinese Chem. Lett.* **2017**, *28*, 1194–1199.
18. Kusano, M.; Koshino, H.; Uzawa, J.; Fujioka, S.; Kawano, T.; Kimura, Y. Simplicissin, a new pollen growth inhibitor produced by the fungus, *Penicillium* cf. *simplicissimum* (Oudemans) Thorn No. 410. *Biosci. Biotechnol. Biochem.* **1997**, *61*, 2153–2155.
19. Li, J.; Wang, Y.; Hao, X.; Li, S.; Jia, J.; Guan, Y.; Peng, Z.; Bi, H.; Xiao, C.; Cen, S.; et al. Broad-spectrum antiviral natural products from the marine-derived *Penicillium* sp. IMB17-046. *Molecules* **2019**, *24*.
20. Nieto, I.J.; Ávila C, I.M. Determinación de ácidos grasos y compuestos triterpenoides del cuerpo fructífero de *Suillus luteus*. *Rev. Colomb. Quím.* **2008**, *37*, 297–304.
21. Okabe, M.; Sugita, T.; Kinoshita, K.; Koyama, K. Macrolides from a marine-derived fungus, *Penicillium meleagrinum* var. *viridiflavum*, showing synergistic effects with fluconazole against azole-resistant *Candida albicans*. *J. Nat. Prod.* **2016**, *79*, 1208–1212.
22. Nakano, H.; Hara, M.; Yamashita, Y.; Ando, K.; Shuto, K. Paxisterol, A new analgesic sterol without anti-inflammation activity from *Penicillium*. *J. Antibiot.* **1988**, *41*, 409–410.
23. Che, Y.; Gloer, J.B.; Wicklow, D.T. Curvicollides A–C: New polyketide-derived lactones from a sclerotium-colonizing isolate of *Podospira curvicolla* (NRRL 25778). *Org. Lett.* **2004**, *6*, 1249–1252.

24. Pang, Z.; Sterner, O. The Isolation of Ergosta-4, 6, 8 (14), 22-tetraen-3 $\beta$ -ol from injured fruit bodies of *Marasmius oreades*. *Nat. Prod. Lett.* **1993**, *3*, 193–196.
25. Matsumura, M.; Miki, S.; Oyama, K.; Tsuchida, M.; Yamamoto, K.; New agricultural/horticultural bactericide 2009, JP2009107953A.
